# Supplementary material for: Spin dynamics phenomena of a cerium(iii) double-decker complex induced by intramolecular electron transfer
Source: Royal Society of Chemistry journal article supplement (doi:10.1039/d4dt00436a), 2024-01-01
Supplement: d4dt00436a1.pdf [file d4dt00436a1.pdf]

## Spin dynamics phenomena of a cerium(III) double-decker complex induced by intramolecular electron transfer

Kana Kobayashi,<sup>a</sup> Michiyuki Suzuki,<sup>a</sup> Tetsu Sato,<sup>a</sup> Yoji Horii,<sup>b</sup> Takefumi Yoshida,<sup>c</sup> Brian.  
K. Breedlove,<sup>a</sup> Masahiro Yamashita<sup>a,d</sup> and Keiichi Katoh<sup>e</sup>

---

<sup>a.</sup> *Department of Chemistry, Graduate School of Science, Tohoku University, 6-3,  
Aramaki-Aza-Aoba, Aoba-ku, Sendai, Miyagi 980-8578, Japan*

<sup>b.</sup> *Department of Chemistry, Faculty of Science, Nara Women's University, Kitauoya  
Higashimachi, Nara 630-8506, Japan*

<sup>c.</sup> *Cluster of Nanomaterials, Graduate School of Systems Engineering, Wakayama  
University, 930 Sakae-Dani, Wakayama, 640-8510, Japan.*

<sup>d.</sup> *School of Chemical Science and Engineering, Tongji University, Siping Road 1239,  
Shanghai 200092, P, R, China*

<sup>e.</sup> *Department of Chemistry, Graduate School of Science, Josai University, 1-1, Keyakidai,  
Sakaddo, Saitama 350-0295, Japan. E-mail: [kkatoh@josai.ac.jp](mailto:kkatoh@josai.ac.jp)*

## Table of Contents:

|                                                                                                                                         |     |
|-----------------------------------------------------------------------------------------------------------------------------------------|-----|
| Selected crystallographic data for Ce(obPc) <sub>2</sub> and <b>1</b> : <b>Table S1</b> .....                                           | S4  |
| Crystal structure of Ce(obPc) <sub>2</sub> : <b>Figs. S1-1-3</b> .....                                                                  | S5  |
| Crystal structure of <b>1</b> : <b>Figs. S2-1-3</b> .....                                                                               | S7  |
| PXRD of <b>1</b> : <b>Fig. S3</b> .....                                                                                                 | S8  |
| Selected crystallographic data for Ce(Pc) <sub>2</sub> and <b>2</b> : <b>Table S2</b> .....                                             | S9  |
| Crystal structure of Ce(Pc) <sub>2</sub> : <b>Fig. S4-1-2</b> .....                                                                     | S10 |
| Crystal structure of <b>2</b> : <b>Fig. S5</b> .....                                                                                    | S11 |
| PXRD of <b>2</b> : <b>Fig. S6</b> .....                                                                                                 | S11 |
| Cyclic voltammetry (CV) of Ce(obPc) <sub>2</sub> : <b>Fig. S7-1</b> .....                                                               | S12 |
| Redox potential ( $E_{1/2}$ ) of Ce(obPc) <sub>2</sub> in expressed in volts (CV): <b>Tables S3-1</b> .....                             | S12 |
| Differential pulse voltammetry (DPV) of Ce(obPc) <sub>2</sub> : <b>Fig. S7-2</b> .....                                                  | S13 |
| Redox potential ( $E_{1/2}$ ) of Ce(obPc) <sub>2</sub> in expressed in volts (DPV): <b>Tables S3-2</b> .....                            | S13 |
| UV-vis-NIR data for Ce(obPc) <sub>2</sub> and <b>1</b> : <b>Fig. S8-1</b> .....                                                         | S14 |
| UV-vis-NIR data for Ce(Pc) <sub>2</sub> and <b>2</b> : <b>Fig. S8-2</b> .....                                                           | S14 |
| UV-vis-NIR data for Ce(obPc) <sub>2</sub> and [Ce(obPc) <sub>2</sub> ] <sup>+</sup> : <b>Fig. S8-3</b> .....                            | S15 |
| FT-IR spectra for Ce(obPc) <sub>2</sub> , <b>1</b> , Ce(Pc) <sub>2</sub> , and <b>2</b> : <b>Figs. S9-1-4</b> .....                     | S16 |
| Schematic illustration of the intramolecular electron transfer in Ce(obPc) <sub>2</sub> and Ce(Pc) <sub>2</sub> : <b>Fig. S10</b> ....  | S18 |
| XANES spectra of Ce(obPc) <sub>2</sub> , <b>1</b> , Ce(Pc) <sub>2</sub> : <b>Figs. S11</b> .....                                        | S18 |
| Deconvolution analysis data for the Ce(Pc) <sub>2</sub> based complexes in Fig. S11: <b>Table S4-1-2</b> .....                          | S19 |
| Magnetic properties of Ce(obPc) <sub>2</sub> and Ce(Pc) <sub>2</sub> : <b>Fig. S12 and S13</b> .....                                    | S20 |
| $M$ versus $HT^{-1}$ for powder samples of <b>2</b> : <b>Fig. S14</b> .....                                                             | S21 |
| The $M$ - $H$ curve simulation: <b>Fig. S15</b> .....                                                                                   | S22 |
| Wavefunction composition of the <sup>2</sup> F <sub>5/2</sub> states of [Ce(Pc) <sub>2</sub> ] <sup>-</sup> : <b>Table S5-1</b> .....   | S23 |
| Wavefunction composition of the <sup>2</sup> F <sub>5/2</sub> states of [Ce(obPc) <sub>2</sub> ] <sup>-</sup> : <b>Table S5-2</b> ..... | S23 |
| Calculated $g$ -tensor for the Kramers doublets (KD): <b>Table S5-3</b> .....                                                           | S23 |
| Ligand field parameters obtained from ab initio calculation: <b>Table S6</b> .....                                                      | S24 |
| $\nu$ and $T$ dependence of ac measurements on <b>1</b> in $H_{dc} =$ zero and 250 Oe: <b>Fig. S16-1</b> .....                          | S25 |
| $\nu$ and $T$ dependence of ac measurements on <b>2</b> in $H_{dc} =$ zero and 750 Oe: <b>Fig. S16-2</b> .....                          | S25 |
| $\nu$ dependence of ac measurements on <b>1</b> in $H_{dc} =$ 50–3000 Oe at 4 K: <b>Fig. S17</b> .....                                  | S26 |
| $\nu$ dependence of ac measurements on <b>2</b> in $H_{dc} =$ zero–16 kOe at 4 K: <b>Fig. S18</b> .....                                 | S26 |
| Generalized Debye model: <b>eqns. S1-S3</b> .....                                                                                       | S27 |
| $H_{dc}$ dependence of $\tau$ for <b>1</b> and <b>2</b> at 4 K.: <b>Fig. S19</b> .....                                                  | S27 |
| Fitting parameters of <b>2</b> for spin dynamic properties: <b>Table S7</b> .....                                                       | S27 |
| Ac measurements for <b>1</b> at 1.8–11 K in $H_{dc} =$ 250 Oe: <b>Fig. S20</b> .....                                                    | S28 |
| Ac measurements for <b>2</b> at 1.8–11 K in $H_{dc} =$ 750 Oe: <b>Fig. S21</b> .....                                                    | S29 |
| Ac measurements for <b>2</b> at 11–20 K in $H_{dc} =$ 750 Oe: <b>Fig. S22</b> .....                                                     | S30 |

|                                                                                                                                |     |
|--------------------------------------------------------------------------------------------------------------------------------|-----|
| An Arrhenius plot of <b>1</b> and <b>2</b> : <b>Fig. S23</b> .....                                                             | S30 |
| Magnetic axis of the ground doublet of $[\text{Ce}(\text{Pc})_2]^-$ and $[\text{Ce}(\text{obPc})_2]^-$ : <b>Fig. S24</b> ..... | S31 |
| Ligand field splitting of $[\text{Ce}(\text{Pc})_2]^-$ : <b>Fig. S25-1</b> .....                                               | S31 |
| Ligand field splitting of $[\text{Ce}(\text{obPc})_2]^-$ : <b>Fig. S25-2</b> .....                                             | S32 |
| Energy levels of $^2F_{5/2}$ states: <b>Table S7</b> .....                                                                     | S32 |
| References.....                                                                                                                | S33 |

**Table S1.** Selected crystallographic data for Ce(obPc)<sub>2</sub> and TBA[Ce(obPc)<sub>2</sub>] (**1**)

| Complex                                    | Ce(obPc) <sub>2</sub>                                                | TBA[Ce(obPc) <sub>2</sub> ] ( <b>1</b> )                                                                                   |
|--------------------------------------------|----------------------------------------------------------------------|----------------------------------------------------------------------------------------------------------------------------|
| CCDC                                       | 2332889                                                              | 2332908                                                                                                                    |
| Formula                                    | C <sub>128</sub> H <sub>160</sub> N <sub>16</sub> O <sub>16</sub> Ce | C <sub>128</sub> H <sub>160</sub> N <sub>16</sub> O <sub>16</sub> Ce<br>C <sub>16</sub> H <sub>36</sub> N (counter cation) |
| Formula weight                             | 2495.64                                                              | 2561.36                                                                                                                    |
| Temperature/K                              | 153(2)                                                               | 233(2)                                                                                                                     |
| Crystal dimension/mm                       | 0.15 × 0.1 × 0.05                                                    | 0.283 × 0.072 × 0.049                                                                                                      |
| Crystal system                             | Monoclinic                                                           | Monoclinic                                                                                                                 |
| Space group                                | <i>C2/c</i>                                                          | <i>I2/a</i>                                                                                                                |
| <i>a</i> /nm                               | 46.5377(8)                                                           | 33.8407(3)                                                                                                                 |
| <i>b</i> /nm                               | 19.7134(4)                                                           | 11.26360(10)                                                                                                               |
| <i>c</i> /nm                               | 214.1518(2)                                                          | 36.7134(4)                                                                                                                 |
| $\alpha$ /deg                              | 90                                                                   | 90                                                                                                                         |
| $\beta$ /deg                               | 114.724(2)                                                           | 95.2860(10)                                                                                                                |
| $\gamma$ /deg                              | 90                                                                   | 90                                                                                                                         |
| Cell volume/nm <sup>3</sup>                | 11793.0(4)                                                           | 13934.5(2)                                                                                                                 |
| <i>Z</i>                                   | 4                                                                    | 4                                                                                                                          |
| <i>F</i> (000)                             | 4904.0                                                               | 5460.0                                                                                                                     |
| $\rho_{\text{calced}}/\text{g cm}^{-3}$    | 1.306                                                                | 1.221                                                                                                                      |
| $\mu/\text{mm}^{-1}$                       | 0.458                                                                | 0.394                                                                                                                      |
| $\vartheta_{\text{max}}/\text{deg}$        | 27.500                                                               | 27.495                                                                                                                     |
| Total number of reflections                | 13554                                                                | 15999                                                                                                                      |
| Number of reflections > $\sigma$ threshold | 11693                                                                | 14721                                                                                                                      |
| $R_1$ [ $I > 2\sigma(I)$ ]                 | 0.0445                                                               | 0.0368                                                                                                                     |
| $wR_2$ (all data)                          | 0.1019                                                               | 0.0987                                                                                                                     |
| Goodness of fit                            | 1.100                                                                | 1.079                                                                                                                      |

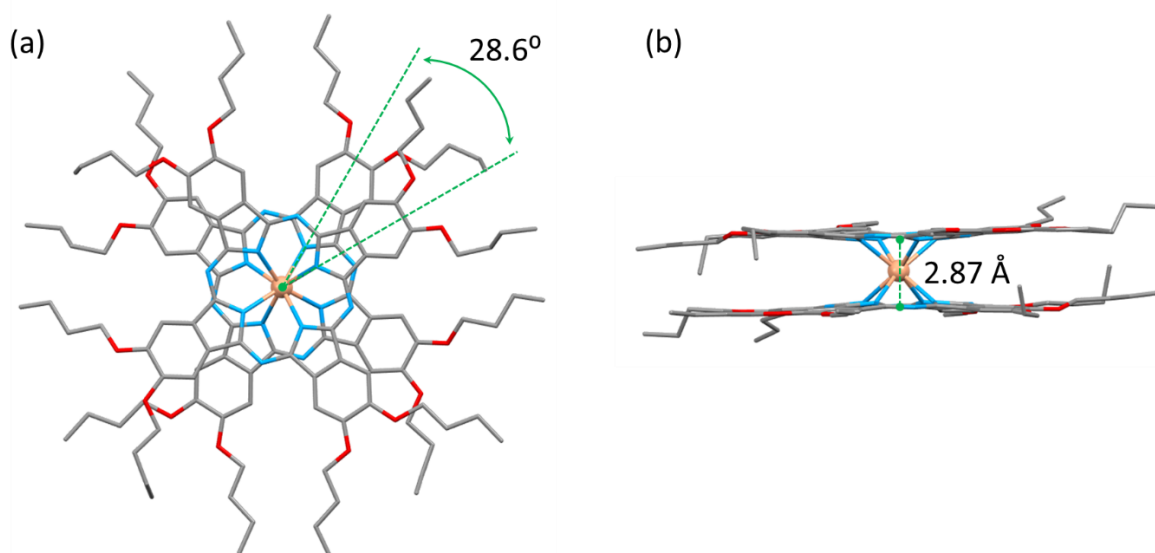

**Fig. S1-1** Crystal structure of Ce(obPc)<sub>2</sub>. (a) top view and (b) side view. H atom in complex omitted for clarity. Ce<sup>4+</sup>: light orange, C: grey, and N: blue.

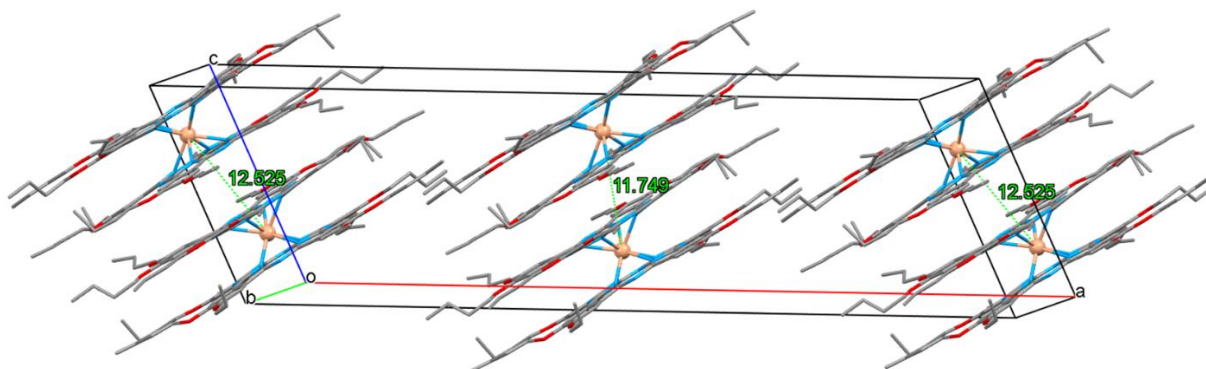

**Fig. S1-2** Crystal packing of Ce(obPc)<sub>2</sub> along the *b*-axis (side view). Hydrogens were omitted for clarity. Ce<sup>4+</sup>: light orange, C: grey, and N: blue.

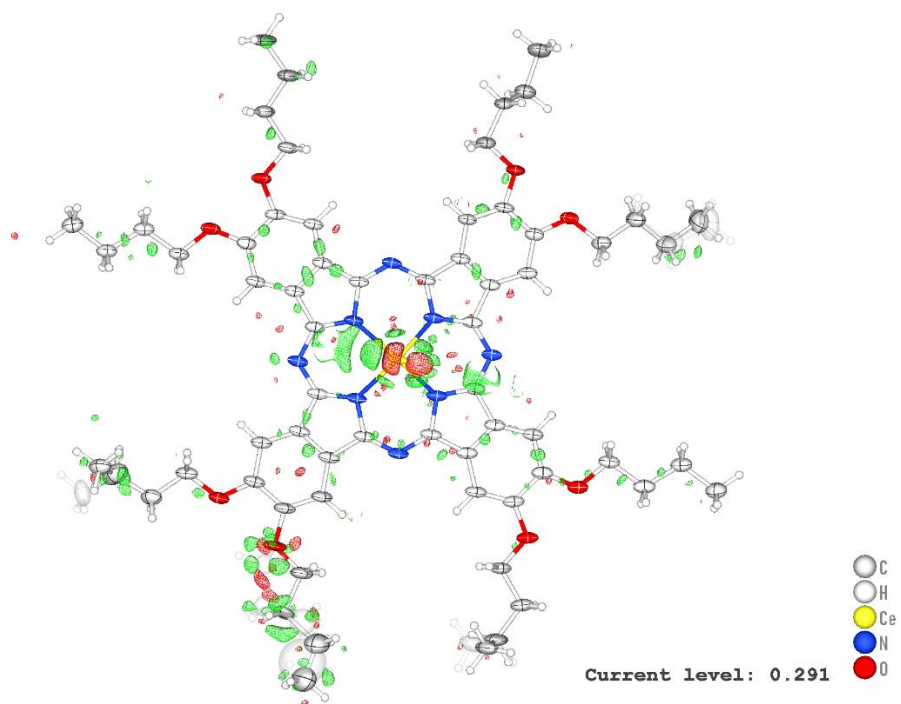

**Fig. S1-3** Diagram showing the disorder processing of  $\text{Ce}(\text{obPc})_2$ .

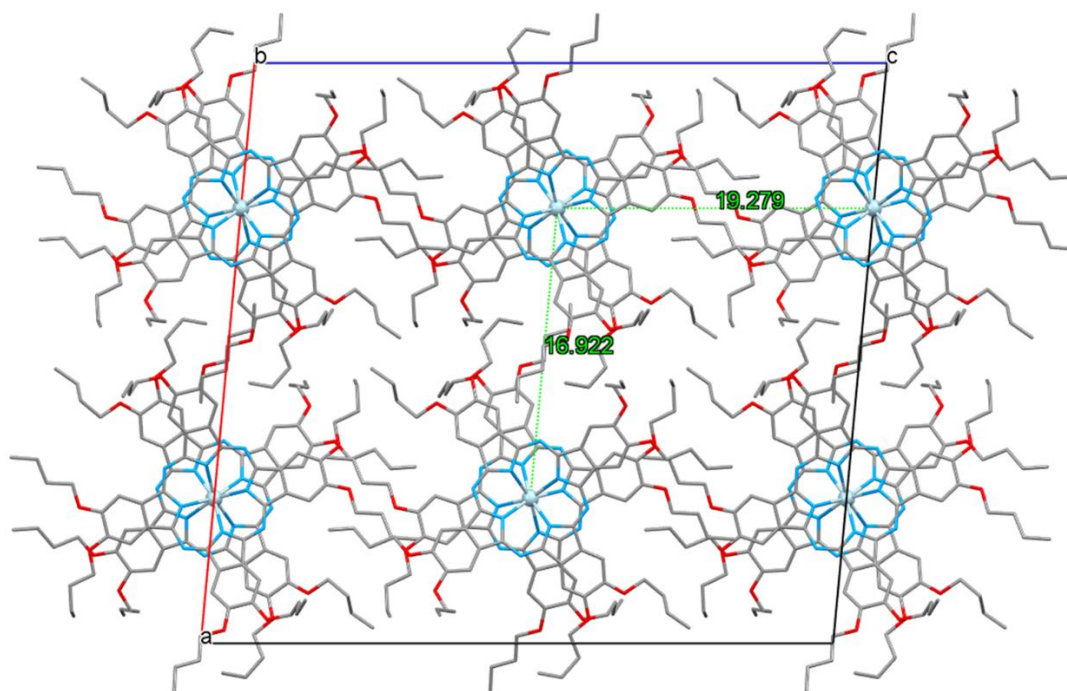

**Fig. S2-1** Crystal packing of **1** in the unit cell (top view). TBA<sup>+</sup> and hydrogens were omitted for clarity. Ce<sup>3+</sup>: light blue, C: grey, and N: blue.

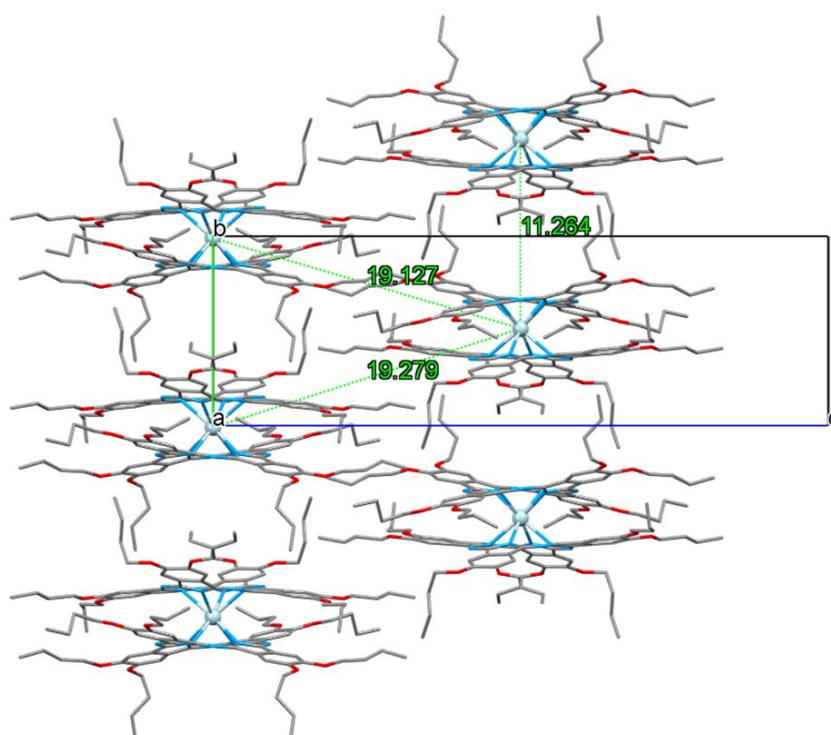

**Fig. S2-2** Crystal packing of **1** along the *b*-axis (side view). TBA<sup>+</sup> and hydrogens were omitted for clarity. Ce<sup>3+</sup>: light blue, C: grey, and N: blue.

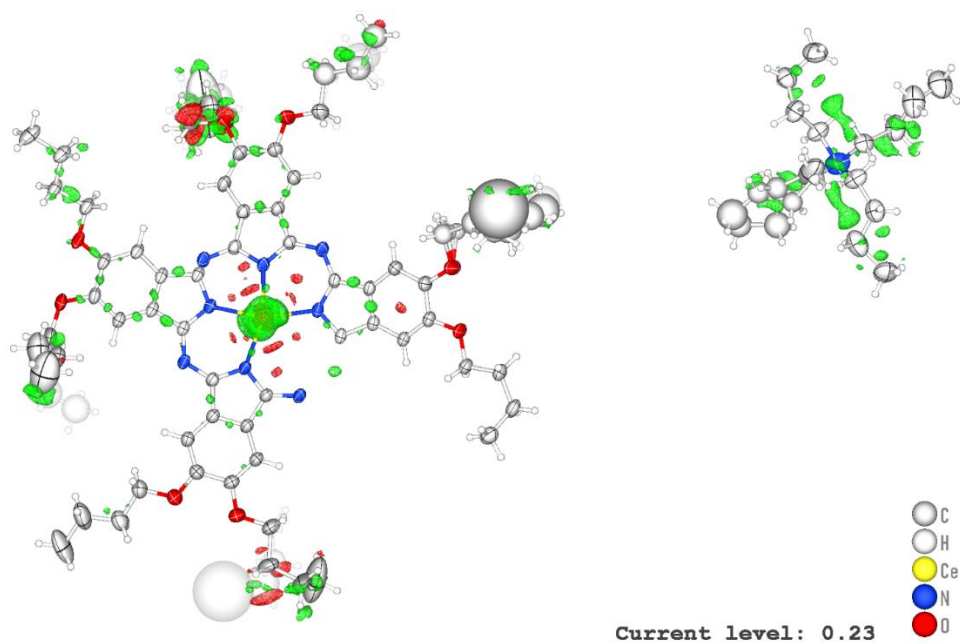

**Fig. S2-3** Diagram showing the disorder processing of complex **1**.

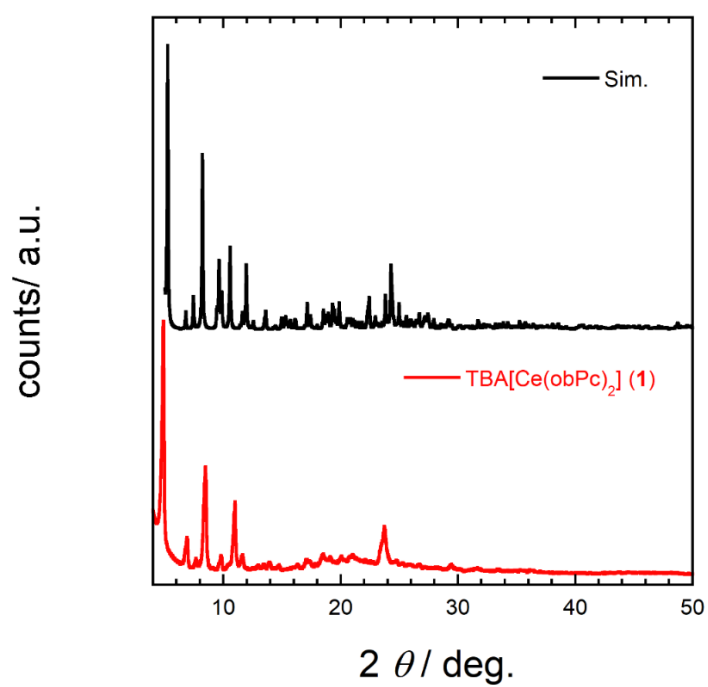

**Fig. S3** PXRD pattern of **1** at 298 K. The microcrystalline PXRD and sim almost overlap, but some polymorphs are present (see main text).



**Table S2.** Selected crystallographic data for Ce(Pc)<sub>2</sub> and TBA[Ce(Pc)<sub>2</sub>] (**2**) (This work)

| Complex                                    | Ce(Pc) <sub>2</sub>                                | TBA[Ce(Pc) <sub>2</sub> ] ( <b>2</b> )                                                                   |
|--------------------------------------------|----------------------------------------------------|----------------------------------------------------------------------------------------------------------|
| CCDC                                       | 1188924 <sup>1</sup>                               | 148306 <sup>2</sup>                                                                                      |
| Formula                                    | C <sub>64</sub> H <sub>32</sub> N <sub>16</sub> Ce | C <sub>64</sub> H <sub>32</sub> N <sub>16</sub> Ce<br>C <sub>16</sub> H <sub>36</sub> N (counter cation) |
| Formula weight                             | 1165.18                                            | 1407.63                                                                                                  |
| Temperature/K                              | 100(2)                                             | 100(2)                                                                                                   |
| Crystal dimension/mm                       | 0.3 × 0.20 × 0.10                                  | 0.22 × 0.20 × 0.10                                                                                       |
| Crystal system                             | Monoclinic                                         | Tetragonal                                                                                               |
| Space group                                | <i>C2/c</i>                                        | <i>P4/ncc</i>                                                                                            |
| <i>a</i> /nm                               | 18.7128(13)                                        | 16.8359(3)                                                                                               |
| <i>b</i> /nm                               | 18.6702(9)                                         | 16.8359(3)                                                                                               |
| <i>c</i> /nm                               | 15.5612(13)                                        | 22.4766(10)                                                                                              |
| $\alpha$ /deg                              | 90                                                 | 90                                                                                                       |
| $\beta$ /deg                               | 114.369(9)                                         | 90                                                                                                       |
| $\gamma$ /deg                              | 90                                                 | 90                                                                                                       |
| Cell volume/nm <sup>3</sup>                | 4952.3(7)                                          | 6370.9(4)                                                                                                |
| <i>Z</i>                                   | 4                                                  | 4                                                                                                        |
| <i>F</i> (000)                             | 2344.0                                             | 2900.0                                                                                                   |
| $\rho_{\text{calced}}$ /g cm <sup>-3</sup> | 1.563                                              | 1.468                                                                                                    |
| $\mu$ /mm <sup>-1</sup>                    | 0.983                                              | 0.778                                                                                                    |
| $\vartheta_{\text{max}}$ /deg              | 30.814                                             | 30.619                                                                                                   |
| Total number of reflections                | 6948                                               | 4519                                                                                                     |
| Number of reflections > $\sigma$ threshold | 4936                                               | 3239                                                                                                     |
| $R_1$ [ $I > 2\sigma(I)$ ]                 | 0.0553                                             | 0.0539                                                                                                   |
| $wR_2$ (all data)                          | 0.1173                                             | 0.1278                                                                                                   |
| Goodness of fit                            | 1.030                                              | 1.071                                                                                                    |

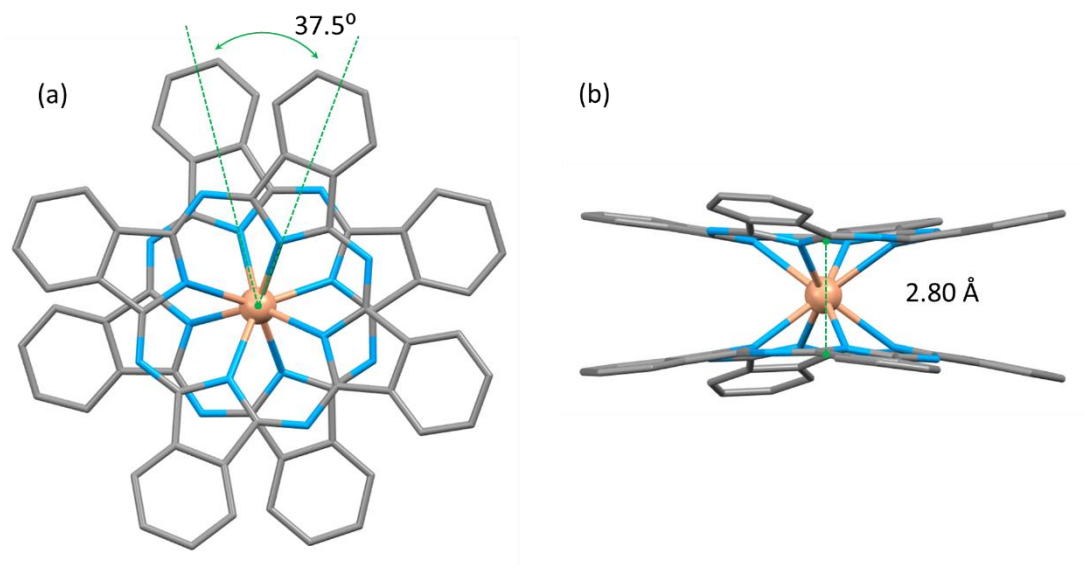

**Fig. S4-1** (a) Top and (b) side views of the crystal structure of  $\text{Ce}(\text{Pc})_2$ . H atom in complex omitted for clarity.  $\text{Ce}^{4+}$ : light orange, C: grey, and N: blue.

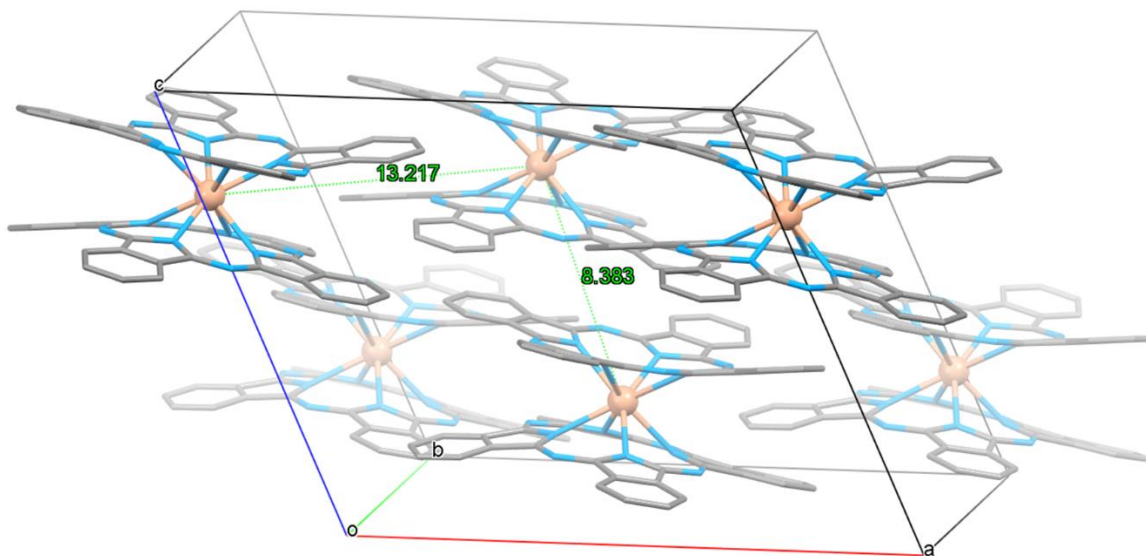

**Fig. S4-2** Crystal packing of  $\text{Ce}(\text{Pc})_2$  along the  $b$ -axis (side view). Hydrogens were omitted for clarity.  $\text{Ce}^{4+}$ : light orange, C: grey, and N: blue.

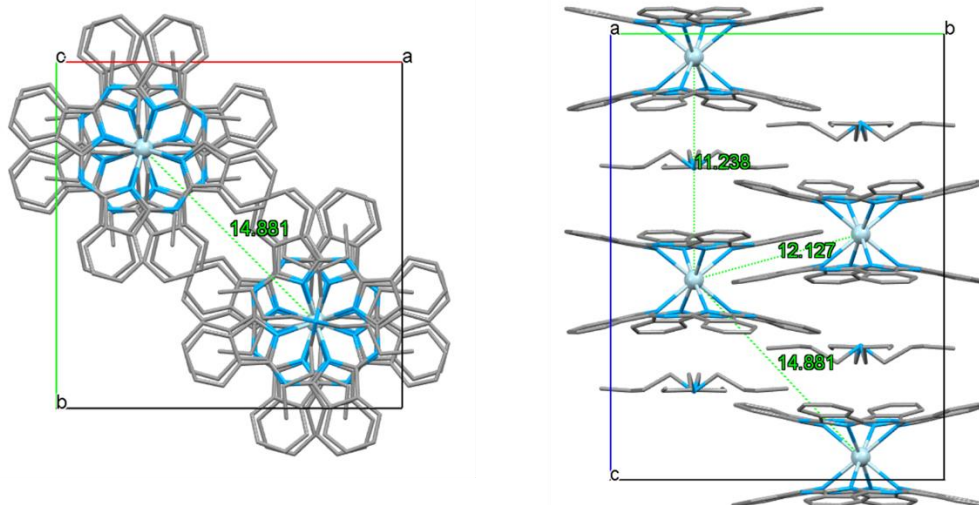

**Fig. S5** Crystal packing of **2**. Hydrogen atoms were omitted for clarity. Ce<sup>3+</sup>: light blue, C: grey, and N: blue.

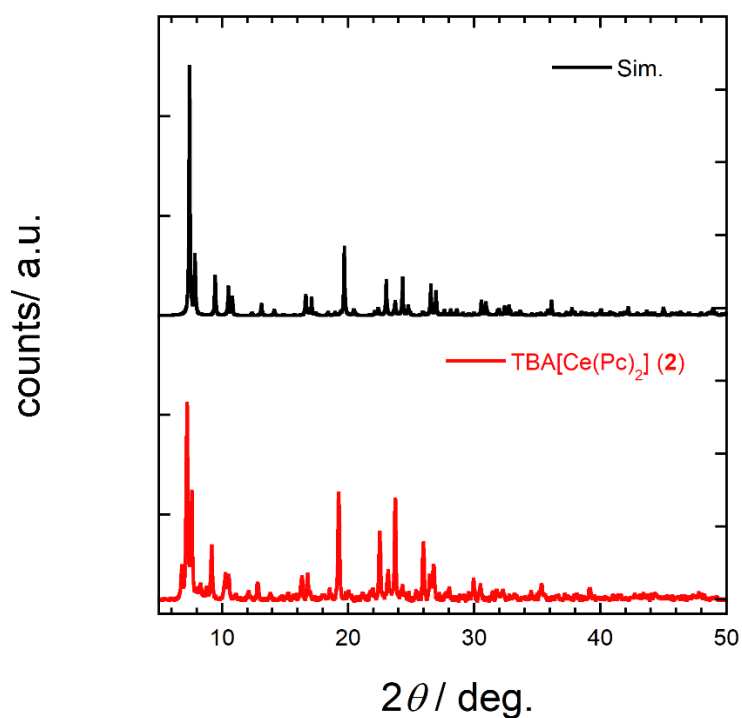

**Fig. S6** PXRD pattern of **2** at 298 K. The microcrystalline PXRD pattern and the simulation almost overlap, but some polymorphs also appear (see main text).

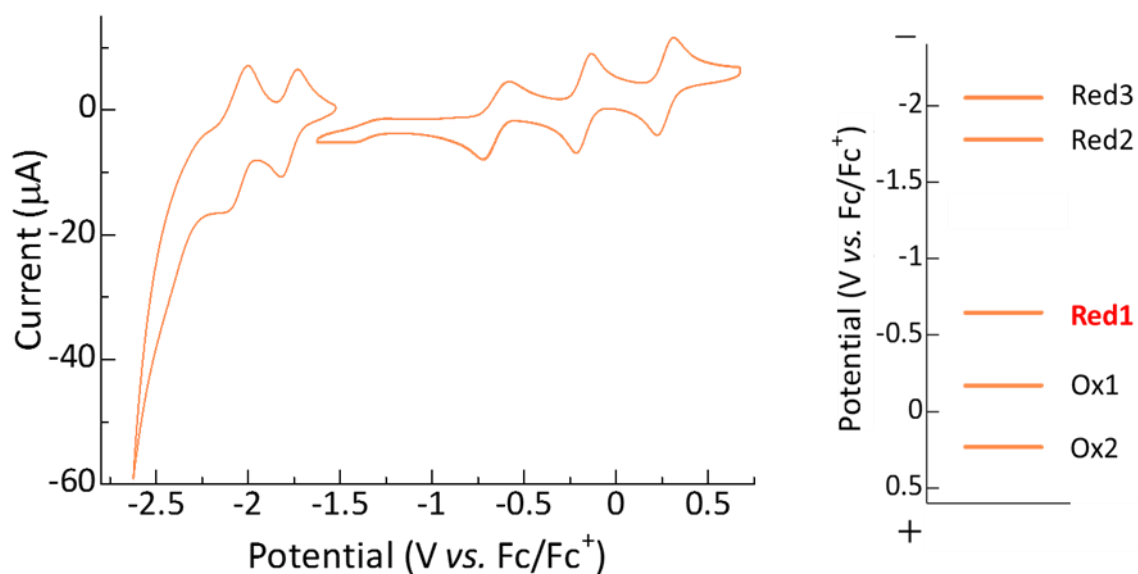

**Fig. S7-1** Cyclic voltammetry (CV) of Ce(obPc)<sub>2</sub>. Sample concentration 0.5 mM; glassy carbon electrode vs. Ag/Ag<sup>+</sup>, 0.1 M *n*-Bu<sub>4</sub>NPF<sub>6</sub> in CH<sub>2</sub>Cl<sub>2</sub>,  $\nu = 100 \text{ mV s}^{-1}$ , 298 K. Potentials were referenced to a Fc/Fc<sup>+</sup> internal standard.

**Table S3-1** Redox potential ( $E_{1/2}$ ) of Ce(obPc)<sub>2</sub> in expressed in volts

| Complex               | $E_{1/2}^{\text{Red3}}$ | $E_{1/2}^{\text{Red2}}$ | $E_{1/2}^{\text{Red1}}$ | $E_{1/2}^{\text{Ox1}}$ | $E_{1/2}^{\text{Ox2}}$ |
|-----------------------|-------------------------|-------------------------|-------------------------|------------------------|------------------------|
| Ce(obPc) <sub>2</sub> | -2.050                  | -1.777                  | -0.646                  | -0.170                 | 0.232                  |
| Tb(obPc) <sub>2</sub> | -2.244                  | -1.832                  | –                       | -0.591                 | -0.178                 |

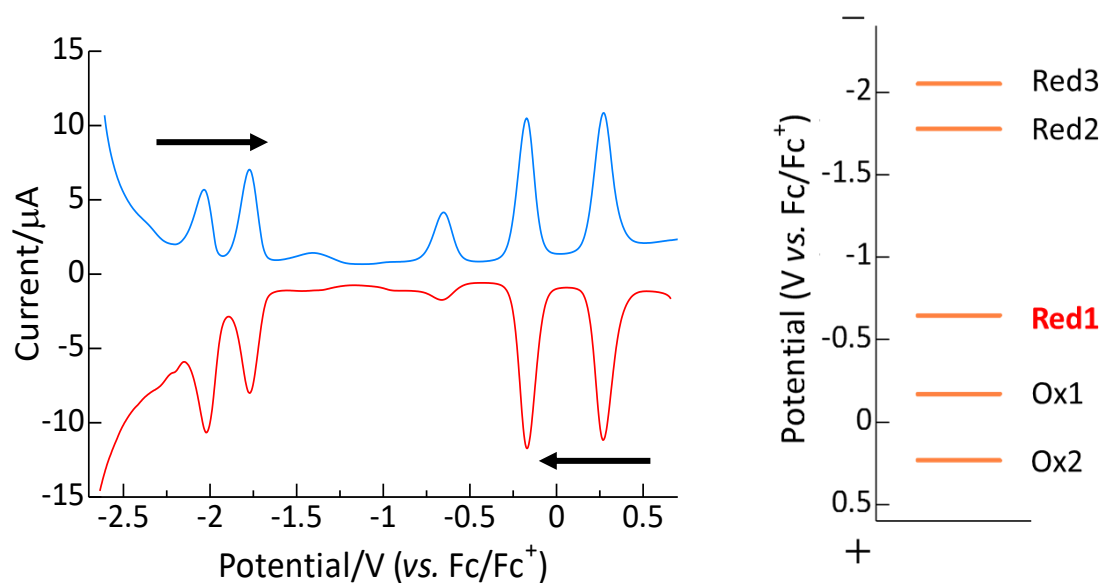

**Fig. S7-2** Differential pulse voltammetry (DPV) of Ce(obPc)<sub>2</sub>. Sample concentration 0.5 mM; glassy carbon working electrode vs. Ag/Ag<sup>+</sup>, 0.1 M *n*-Bu<sub>4</sub>NPF<sub>6</sub> in CH<sub>2</sub>Cl<sub>2</sub>,  $\nu = 100 \text{ mV s}^{-1}$ , 294 K, pulse width: 50 ms, period: 0.5 s. Potentials were referenced to a Fc/Fc<sup>+</sup> internal standard.

**Table S3-2.** Redox potential (V) of Ce(obPc)<sub>2</sub>

| Complex               | $E_{1/2}^{\text{Red3}}$ | $E_{1/2}^{\text{Red2}}$ | $E_{1/2}^{\text{Red1}}$ | $E_{1/2}^{\text{Ox1}}$ | $E_{1/2}^{\text{Ox2}}$ |
|-----------------------|-------------------------|-------------------------|-------------------------|------------------------|------------------------|
| Ce(obPc) <sub>2</sub> | -2.033                  | -1.774                  | -0.640                  | -0.162                 | 0.275                  |
| Tb(obPc) <sub>2</sub> | -2.230                  | -1.818                  | –                       | -0.591                 | -0.186                 |

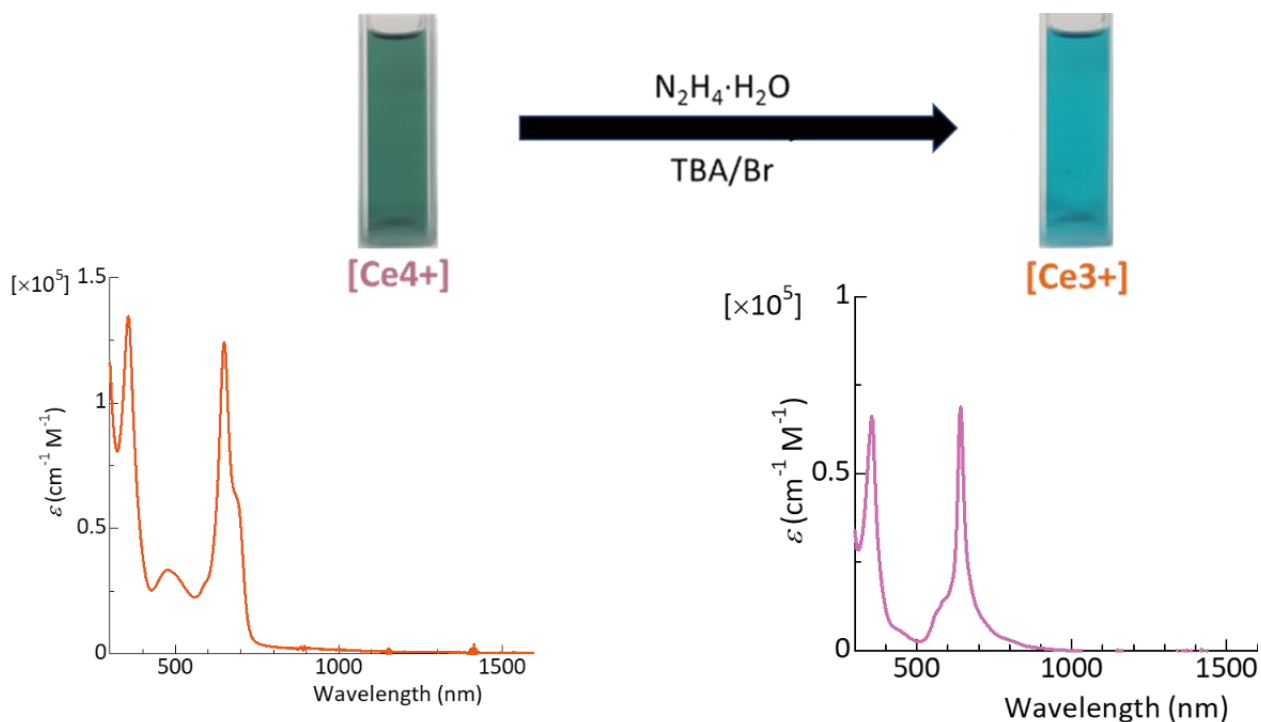

**Fig. S8-1** Electronic spectra of  $\text{Ce}(\text{obPc})_2$  and  $\text{TBA}[\text{Ce}(\text{obPc})_2]$  (**1**) ( $1.0 \times 10^{-5} \text{ M}$ ) in  $\text{CHCl}_3$  at 298 K.

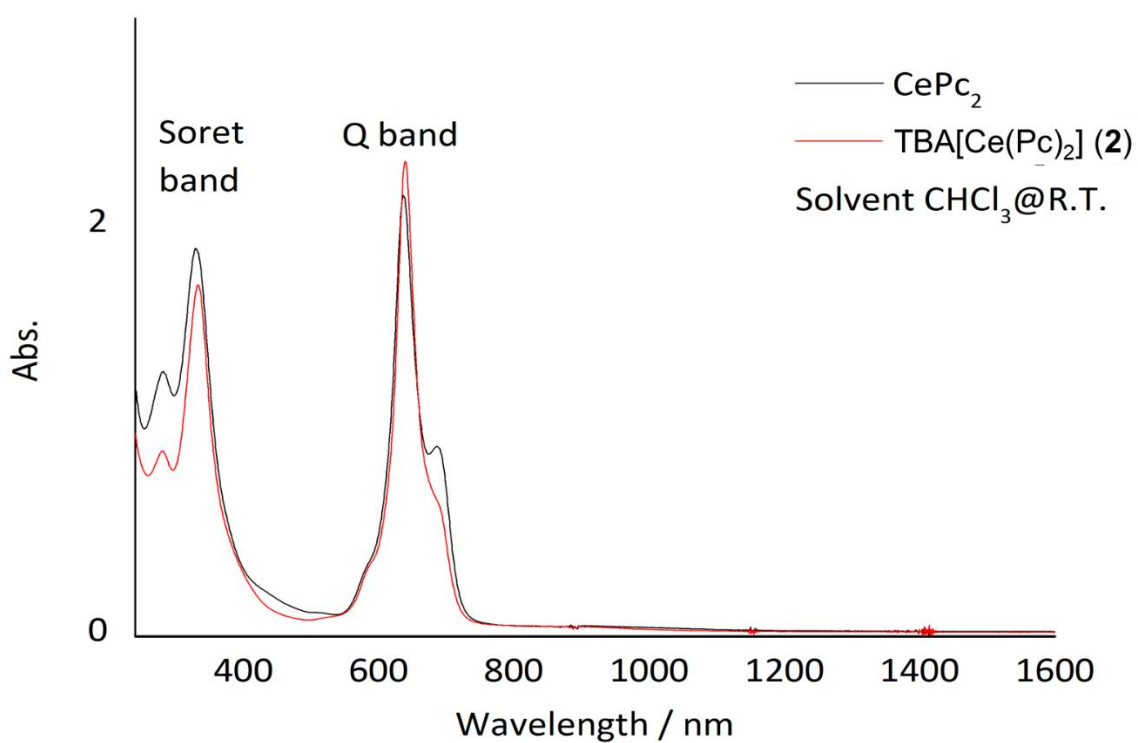

**Fig. S8-2** Electronic spectra of  $\text{Ce}(\text{Pc})_2$  and  $\text{TBA}[\text{Ce}(\text{Pc})_2]$  (**2**) in  $\text{CHCl}_3$  at 298 K.

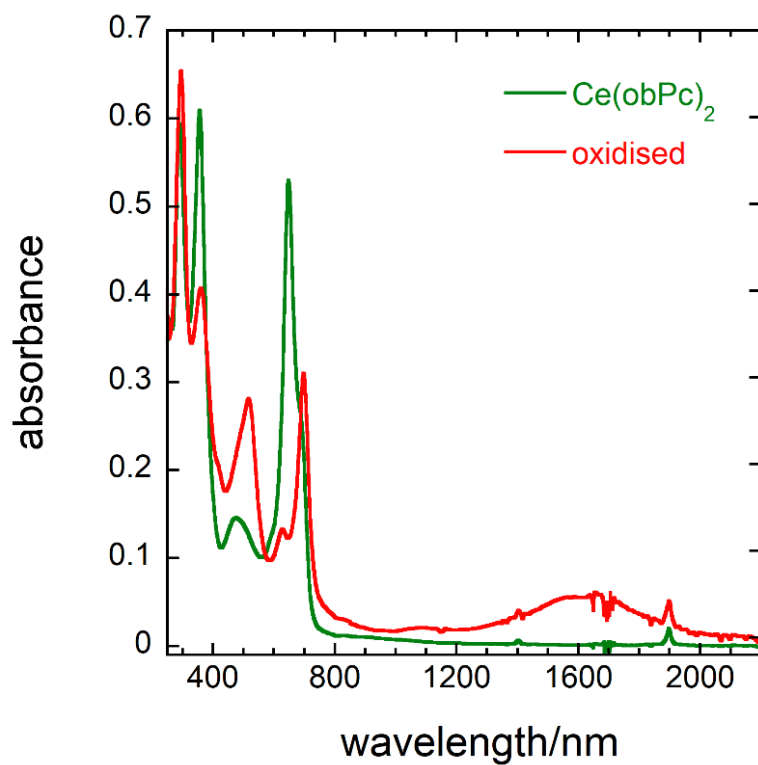

**Fig. S8-3** Electronic spectra for  $\text{Ce}(\text{obPc})_2$  ( $10^{-6}$  M) in its neutral and oxidised forms in dichloromethane at 289 K. Oxidation was performed using phenoxathiine hexachloroantimonate (1.0 eq.) . The intervalence (IV) absorption band in the near-infrared region above 1200 nm suggests that there are  $\pi$  radicals on the Pc ligands in the  $[\text{Ce}^{4+}(\text{Pc})^{\bullet-}(\text{Pc})^{2-}]^+$  unit.<sup>3</sup>

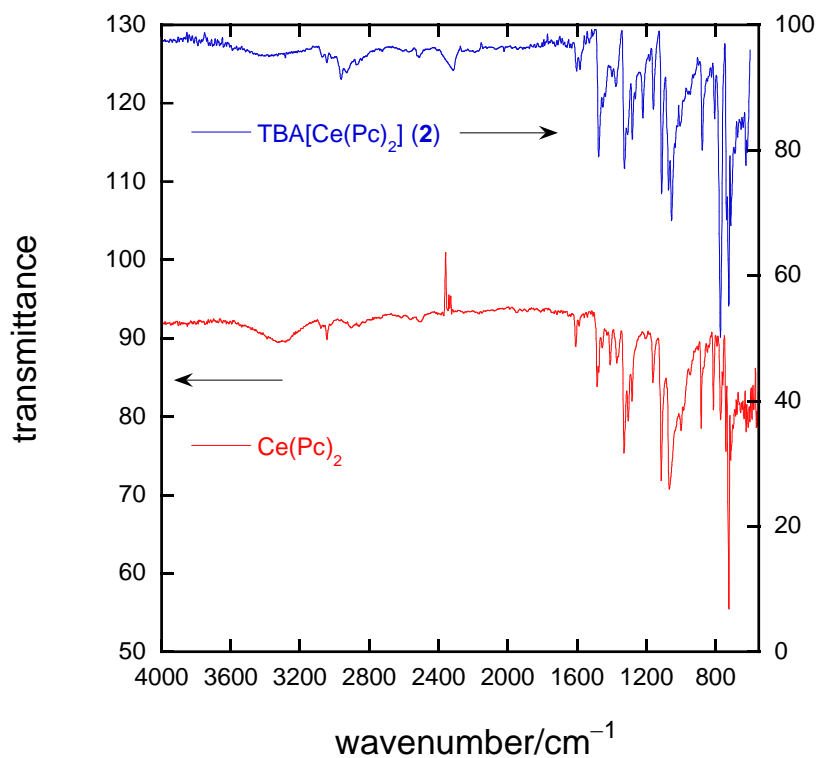

**Fig. S9-1** FT-IR spectra for  $\text{Ce}(\text{Pc})_2$  and  $\text{TBA}[\text{Ce}(\text{Pc})_2]$  (**2**) as KBr pellets at 298 K.

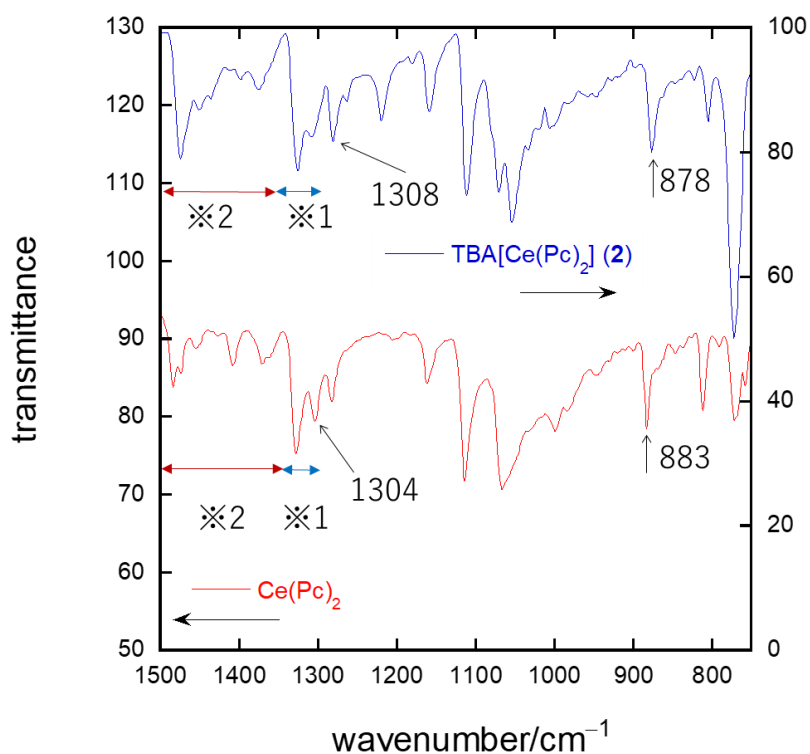

**Fig. S9-2** FT-IR spectra ( $750\text{--}1500\text{ cm}^{-1}$ ) for  $\text{Ce}(\text{Pc})_2$  and  $\text{TBA}[\text{Ce}(\text{Pc})_2]$  (**2**) as KBr pellets at 298 K.

※1  $1300\text{--}1350$ : pyrrole stretching. ※2  $1370\text{--}1484\text{ cm}^{-1}$ : isoindole stretching.<sup>4</sup>



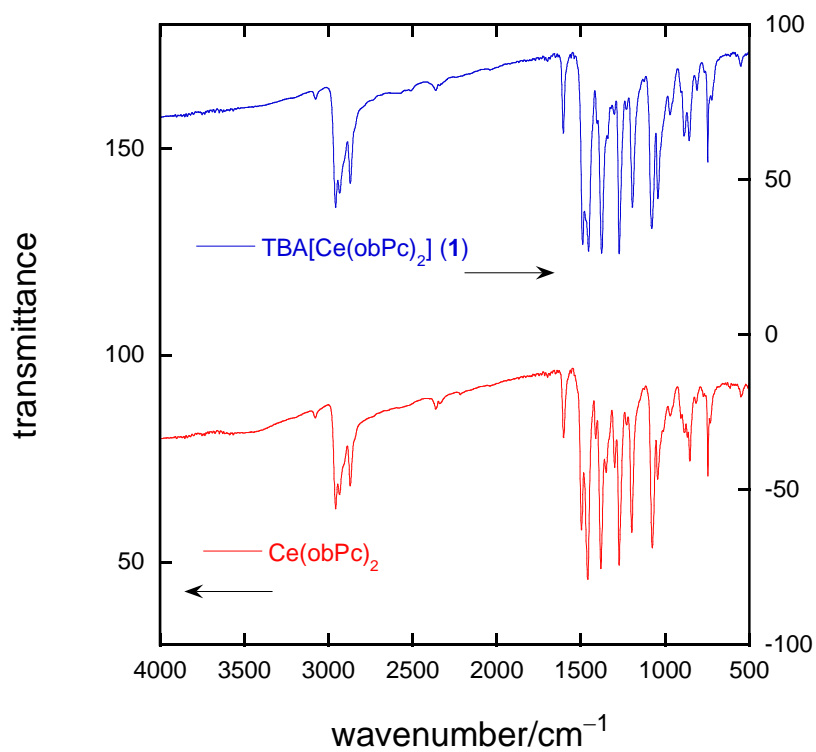

**Fig. S9-3** FT-IR spectra for  $\text{Ce}(\text{obPc})_2$  and  $\text{TBA}[\text{Ce}(\text{obPc})_2]$  (**1**) as KBr pellets at 289 K.

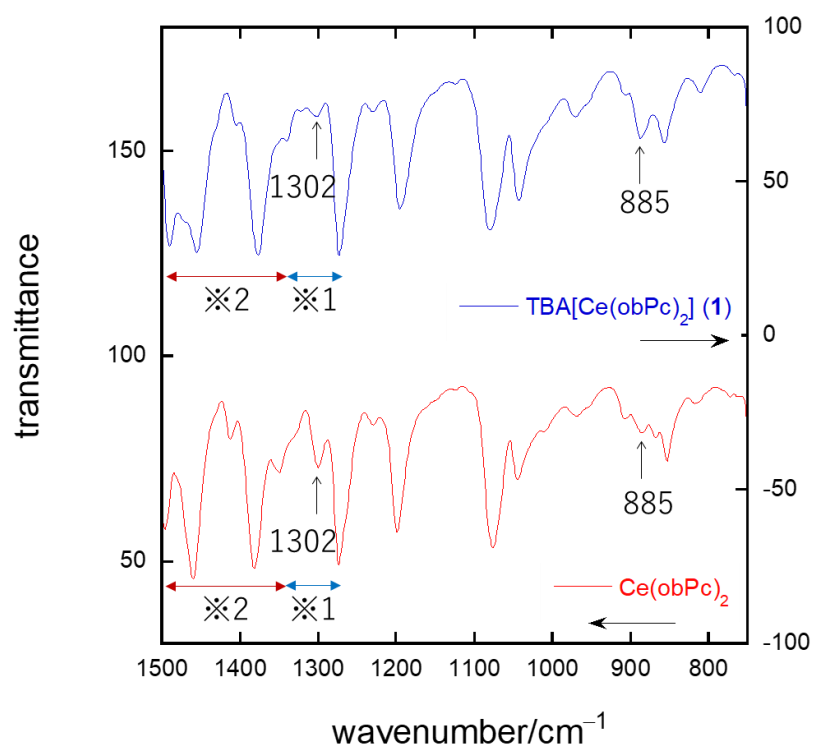

**Fig. S9-4** FT-IR spectra ( $750\text{--}1500\text{ cm}^{-1}$ ) for  $\text{Ce}(\text{obPc})_2$  and  $\text{TBA}[\text{Ce}(\text{obPc})_2]$  (**1**) as KBr pellets at 298 K.

※1  $1300\text{--}1350$ : pyrrole stretching. ※2  $1370\text{--}1484\text{ cm}^{-1}$ : isoindole stretching.<sup>4</sup>

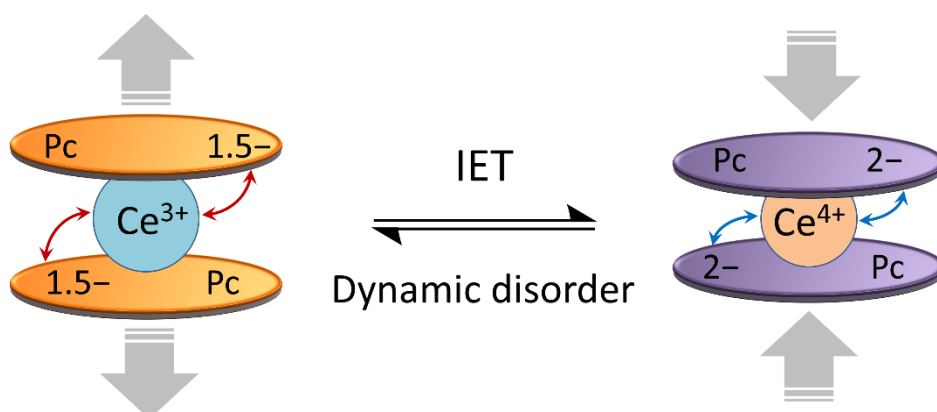

**Fig. S10** Schematic illustration of the intramolecular electron transfer (IET) for neutral  $\text{Ce}(\text{obPc})_2$  and  $\text{Ce}(\text{Pc})_2$  with the dynamic disorder (see main text).

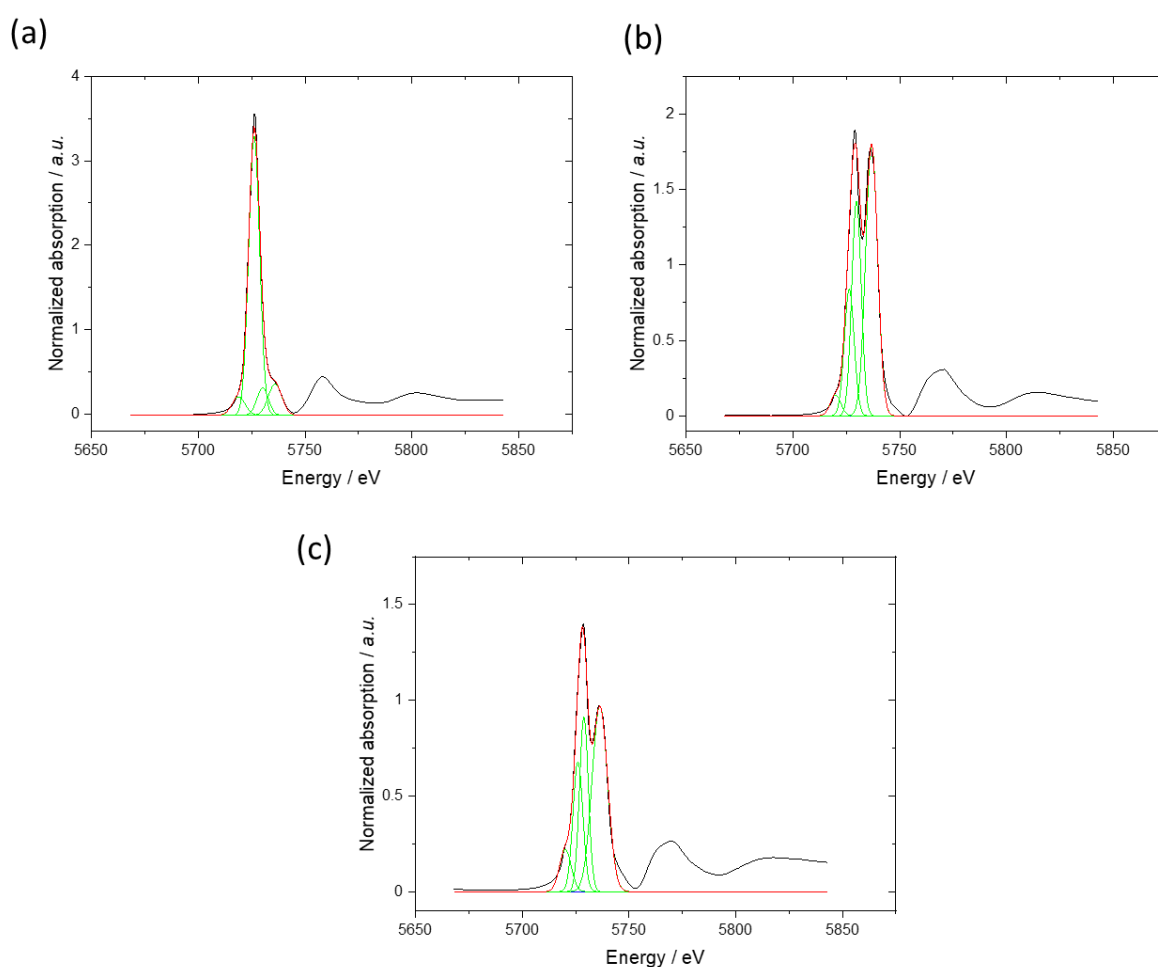

**Fig. 11** Ce  $L_{\text{III}}$ -edge XANES spectra of  $\text{Ce}(\text{Pc})_2$  based complexes. (a)  $\text{TBA}[\text{Ce}(\text{obPc})_2]$  (**1**), (b)  $\text{Ce}(\text{obPc})_2$ , and (c)  $\text{Ce}(\text{Pc})_2$ . Deconvolution analysis was performed based on the literature.<sup>5,6</sup> The solid lines show the results of estimating the components of  $\text{Ce}^{3+}$  and  $\text{Ce}^{4+}$  using a Gaussian function.

**Table S4-1.** Deconvolution analysis data of area ratio for the Ce(Pc)<sub>2</sub> based complexes in Fig. S11

| Peak     | Position (E/eV) | Ce(obPc) <sub>2</sub> | Ce(Pc) <sub>2</sub> | <b>1</b> |
|----------|-----------------|-----------------------|---------------------|----------|
| Pre-edge | 5721            | 0.18                  | 0.38                | 0.76     |
| <b>a</b> | 5726            | 1.0                   | 1.0                 | 9.6      |
| <b>b</b> | 5729            | 1.65                  | 1.2                 | 1.0      |
| <b>c</b> | 5736            | 2.63                  | 2.26                | 1.3      |

**Table S4-2.** Deconvolution analysis data for the Ce(Pc)<sub>2</sub>-based complexes in Fig. S11

| Ce complex                  | method | Area ratio                         | Percentage(%)                      | Net valence<br>of Ce ion | Method |
|-----------------------------|--------|------------------------------------|------------------------------------|--------------------------|--------|
|                             |        | Ce <sup>3+</sup> :Ce <sup>4+</sup> | Ce <sup>3+</sup> :Ce <sup>4+</sup> |                          | Ref.   |
| TBA[Ce(obPc) <sub>2</sub> ] | (A)    | 10.4:2.3                           | 82:18                              | 3.2                      | 5      |
|                             | (B)    | 10.6:1.3                           | 89:11                              | 3.1                      | 6      |
| Ce(obPc) <sub>2</sub>       | (A)    | 1.2:4.3                            | 22:78                              | 3.8                      | 5      |
|                             | (B)    | 2.7:5.3                            | 51:49                              | 3.5                      | 6      |
| Ce(Pc) <sub>2</sub>         | (A)    | 1.4:3.9                            | 26:74                              | 3.7                      | 5      |
|                             | (B)    | 2.6:4.9                            | 53:47                              | 3.5                      | 6      |

§ Methods for estimating the valence of Ce ion vary depending on the researcher. We used two methods to estimate the Ce valence of the Ce(Pc)<sub>2</sub>-based complexes. (A) The ratio was calculated assuming that Pre-edge and **a** are derived from Ce<sup>3+</sup> (4f<sup>1</sup>), and **b** and **c** are derived from Ce<sup>4+</sup> (4f<sup>0</sup>).<sup>5</sup> (B) The ratio was calculated assuming that **a** and **b** were derived from Ce<sup>3+</sup> (4f<sup>1</sup>) and **c** was derived from Ce<sup>4+</sup> (4f<sup>0</sup>).<sup>6</sup>

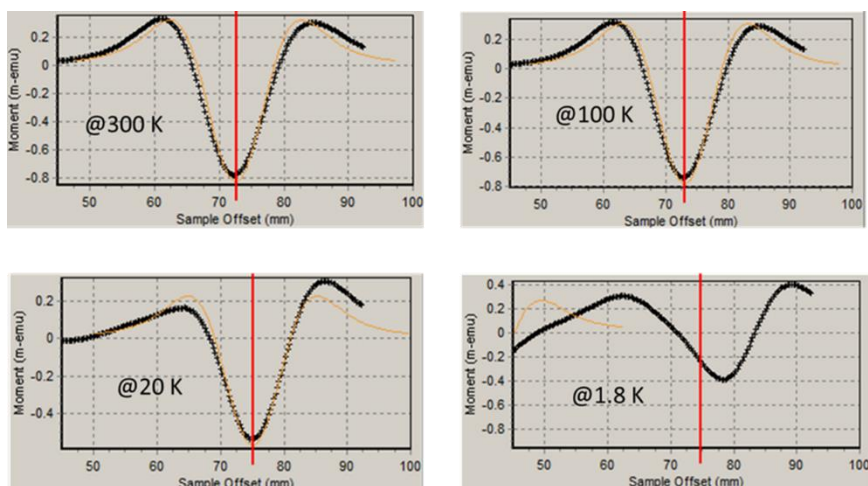

**Fig. S12** In the magnetic measurements, while conducting the centering process to ascertain the precise position of the sample, response curves are procured. If the response curve manifests upward convexity, it signifies the paramagnetic nature of the sample. In contrast, the presence of downward convexity, even in strong magnetic field intensities and high temperatures nearing 2 K, denotes the diamagnetic character of the sample. Measurements of  $\text{Ce}(\text{obPc})_2$  were executed at 300 K, 100 K, 20 K, and 1.8 K in a 10 kOe dc magnetic field. In  $\text{Ce}(\text{obPc})_2$ , diamagnetic response curves were generated across all temperature regimes. Samples that were prepared using a  $\text{Ce}^{3+}$  precursor showed no traces of  $\text{Ce}^{3+}$  in the sample (see Experimental section in main text).

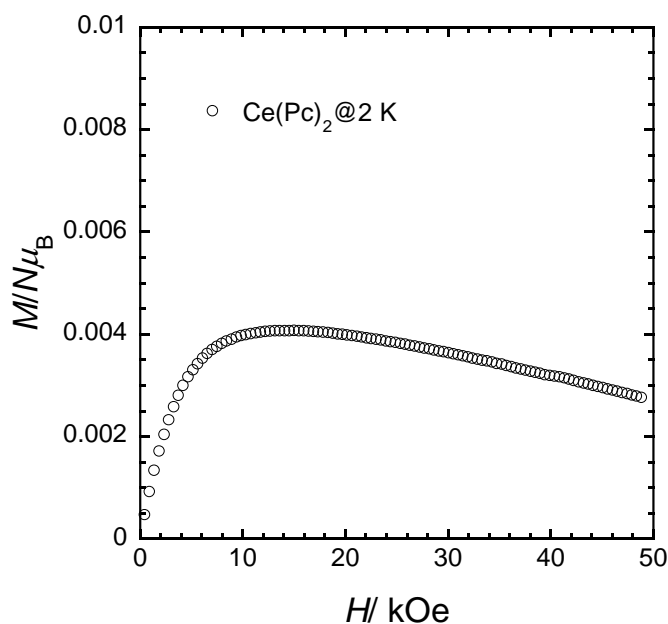

**Fig. S13**  $M$ - $H$  curve for powder samples of  $\text{Ce}(\text{Pc})_2$ . It exhibits paramagnetic properties at 2 K. On the other hand, it exhibited diamagnetic properties above 10 K. Samples that were prepared using a  $\text{Ce}^{4+}$  precursor showed traces of  $\text{Ce}^{3+}$  in the sample (see Experimental section in main text). Thus, both  $\text{Ce}(\text{obPc})_2$  and  $\text{Ce}(\text{Pc})_2$  are in a  $\text{Ce}^{4+}/\text{Ce}^{3+}$  mixed valence state, with the paramagnetic signature observed for  $\text{Ce}(\text{Pc})_2$  indicative of a higher ratio of  $\text{Ce}^{3+}$  in comparison to  $\text{Ce}(\text{obPc})_2$  (Table S4).

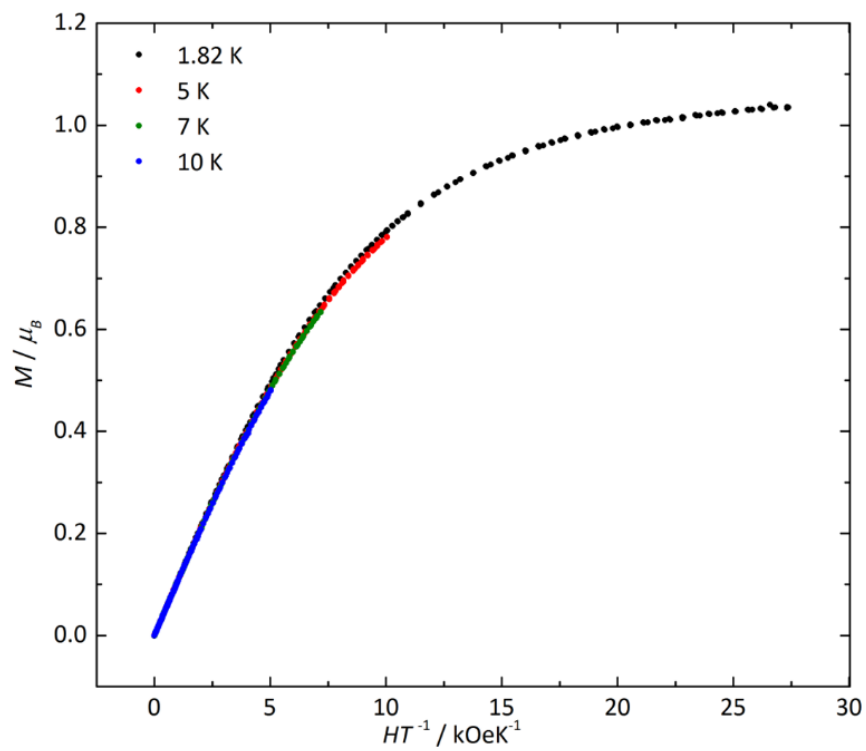

**Fig. S14** Reduced magnetization ( $M$  versus  $HT^{-1}$ ) for powder samples of **2**.

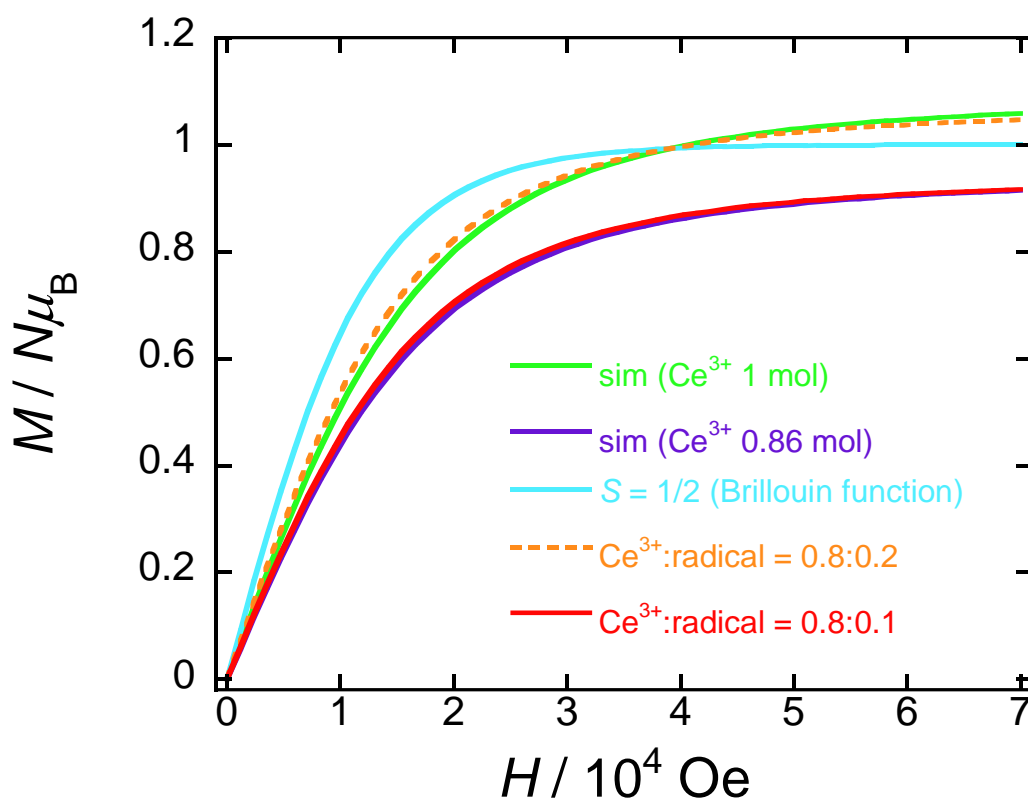

**Fig. S15** As a supplement to Fig. 5, simulation results of the  $M$ - $H$  curve are presented. The simulation curve indicates that the yellow-green line represents 1 mol of  $\text{Ce}^{3+}$  using LFPs. The cyan line represents a radicals delocalized on Pc ligands using Brillouin function with  $S = 1/2$  (1 mol). The purple line, using LFPs with 0.86 mol of  $\text{Ce}^{3+}$ , reproduced the experimental data (see Fig. 5). This is effective when assuming  $\text{Ce}^{3+}:\text{Ce}^{4+} = 0.8:0.2$  based on XANES spectrum analysis (Table S4-2) and attributing magnetic properties to the  $\text{Ce}^{3+}$  component.

On the other hand, the orange dashed line represents the result of simulation at  $[\text{Ce}^{3+}(\text{obPc})^{2-}(\text{obPc})^{2-}]^- : [\text{Ce}^{4+}(\text{obPc})^{2-}(\text{obPc})^{3-}]^- = \text{Ce}^{3+}:\text{radical} = 0.8:0.2$  based on XANES spectrum analysis, which fails to reproduce the experimental data (see Fig. 5). The experimental values can be nearly reproduced by the red line ( $\text{Ce}^{3+}:\text{radical} = 0.8:0.1$ ). These simulations simply add together  $\text{Ce}^{3+}$  and radical components. Considering the XANES spectrum of the neutral species (Table S4-2) and the results of  $M$ - $H$  (Fig. S13), the magnetisation value of the radicals in the  $[\text{Ce}^{4+}(\text{obPc})^{2-}(\text{obPc})^{3-}]^-$  unit resulting from intramolecular electron transfer (IET) are lower than the ratio obtained from XANES spectrum.

**Table S5-1.** Wavefunction composition (in %) of the  $^2F_{5/2}$  states of  $[\text{Ce}(\text{Pc})_2]^-$ 

| $M_J$ | w.f. 1 | w.f. 2 | w.f. 3 | w.f. 4 | w.f. 5 | w.f. 6 |
|-------|--------|--------|--------|--------|--------|--------|
| -5/2  | 98.5   | 0.0    | 0.0    | 1.5    | 0.0    | 0.0    |
| -3/2  | 0.0    | 1.5    | 98.3   | 0.2    | 0.0    | 0.0    |
| -1/2  | 0.0    | 0.0    | 0.0    | 0.0    | 86.5   | 13.5   |
| +1/2  | 0.0    | 0.0    | 0.0    | 0.0    | 13.5   | 86.5   |
| +3/2  | 1.5    | 0.0    | 0.2    | 98.3   | 0.0    | 0.0    |
| +5/2  | 0.0    | 98.5   | 1.5    | 0.0    | 0.0    | 0.0    |

**Table S5-2.** Wavefunction composition (in %) of the  $^2F_{5/2}$  states of  $[\text{Ce}(\text{obPc})_2]^-$ 

| $M_J$ | w.f. 1 | w.f. 2 | w.f. 3 | w.f. 4 | w.f. 5 | w.f. 6 |
|-------|--------|--------|--------|--------|--------|--------|
| -5/2  | 96.0   | 3.2    | 0.6    | 0.0    | 0.0    | 0.2    |
| -3/2  | 0.0    | 0.7    | 0.1    | 46.0   | 49.7   | 3.5    |
| -1/2  | 0.1    | 0.0    | 53.2   | 0.1    | 3.1    | 43.5   |
| +1/2  | 0.0    | 0.1    | 0.1    | 53.2   | 43.5   | 3.1    |
| +3/2  | 0.7    | 0.0    | 46.0   | 0.1    | 3.5    | 49.7   |
| +5/2  | 3.2    | 96.0   | 0.0    | 0.6    | 0.2    | 0.0    |

**Table S5-3.** Calculated  $g$ -tensor for the Kramers doublets (KD)

|     | $[\text{Ce}(\text{Pc})_2]^-$ |       |       | $[\text{Ce}(\text{obPc})_2]^-$ |       |       |
|-----|------------------------------|-------|-------|--------------------------------|-------|-------|
|     | $g_x$                        | $g_y$ | $g_z$ | $g_x$                          | $g_y$ | $g_z$ |
| KD1 | 0.61                         | 0.61  | 3.96  | 0.40                           | 0.51  | 4.01  |
| KD2 | 0.89                         | 0.89  | 1.50  | 0.42                           | 1.31  | 3.18  |
| KD3 | 2.52                         | 2.52  | 0.80  | 0.63                           | 1.30  | 3.16  |

**Table S6.** Ligand field parameters obtained from ab initio calculations

| <i>k</i> | <i>q</i> | <i>B(k,q) / cm<sup>-1</sup></i>     |                                       |
|----------|----------|-------------------------------------|---------------------------------------|
|          |          | [Ce(Pc) <sub>2</sub> ] <sup>-</sup> | [Ce(obPc) <sub>2</sub> ] <sup>-</sup> |
| 2        | -2       | -0.0015308                          | 14.097661                             |
| 2        | -1       | -0.0084485                          | 0.01661913                            |
| 2        | 0        | 972.89188                           | 1030.46862                            |
| 2        | 1        | 0.003407                            | 0.00347098                            |
| 2        | 2        | -0.0219653                          | -142.56892                            |
| 4        | -4       | 0.0004892                           | 0.00217146                            |
| 4        | -3       | -0.0013144                          | 7.70871517                            |
| 4        | -2       | -0.0031819                          | 0.00198782                            |
| 4        | -1       | -97.991263                          | 14.937797                             |
| 4        | 0        | -148.20931                          | -185.40017                            |
| 4        | 1        | -6.587E-05                          | -0.0019471                            |
| 4        | 2        | 0.0026363                           | -12.254691                            |
| 4        | 3        | 0.0004801                           | -0.0015113                            |
| 4        | 4        | 124.06587                           | -117.20673                            |



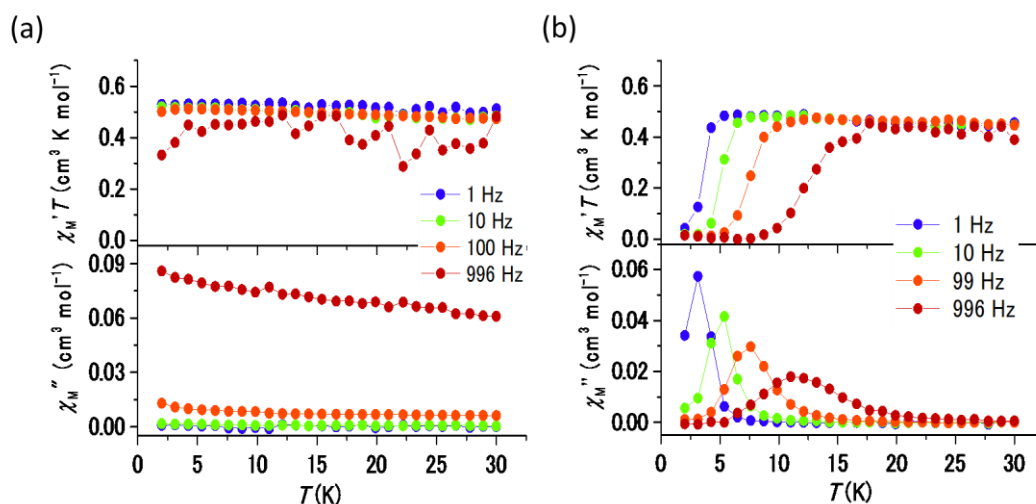

**Fig. S16-1** (a) Frequency ( $\nu$ ) dependences of the (top) in-phase ( $\chi_M'$ ) and (bottom) out-of-phase ( $\chi_M''$ ) ac magnetic susceptibilities of **1** in an  $H_{dc}$  of zero Oe. (b)  $\nu$  dependences of the (top) in-phase ( $\chi_M'$ ) and (bottom) out-of-phase ( $\chi_M''$ ) ac magnetic susceptibilities of **1** in an  $H_{dc}$  of 250 Oe. The solid lines are guides only.

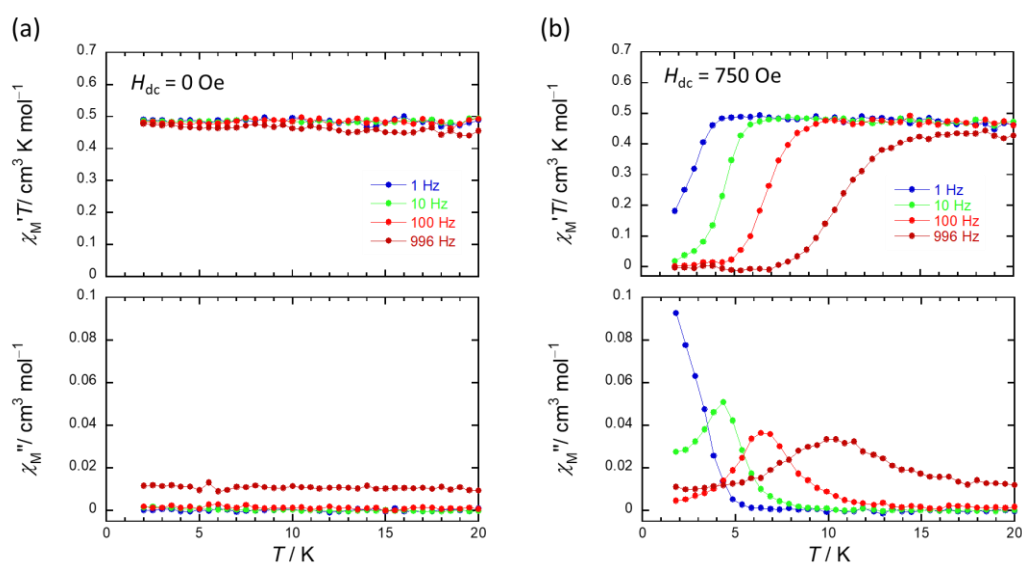

**Fig. S16-2** (a) Frequency ( $\nu$ ) dependences of the (top) in-phase ( $\chi_M'$ ) and (bottom) out-of-phase ( $\chi_M''$ ) ac magnetic susceptibilities of **2** in an  $H_{dc}$  of zero Oe. (b)  $\nu$  dependences of the (top) in-phase ( $\chi_M'$ ) and (bottom) out-of-phase ( $\chi_M''$ ) ac magnetic susceptibilities of **2** in an  $H_{dc}$  of 750 Oe. The solid lines are guides only.

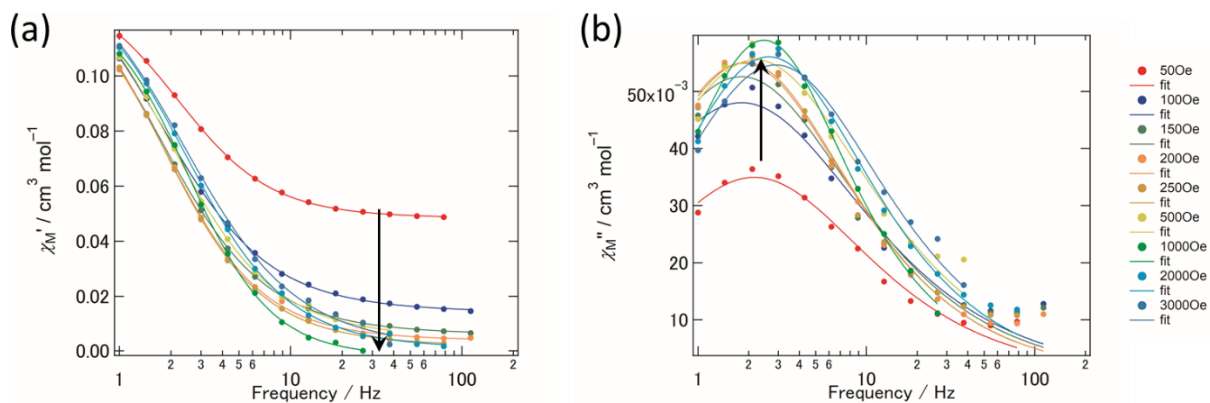

**Fig. S17** Frequency ( $\nu$ ) dependences of the (a) in-phase ( $\chi_M'$ ) and (b) out-of-phase ( $\chi_M''$ ) ac magnetic susceptibilities of **1** at 4 K in several dc magnetic fields. The solid lines were fitted by using eqns. S1–S3.

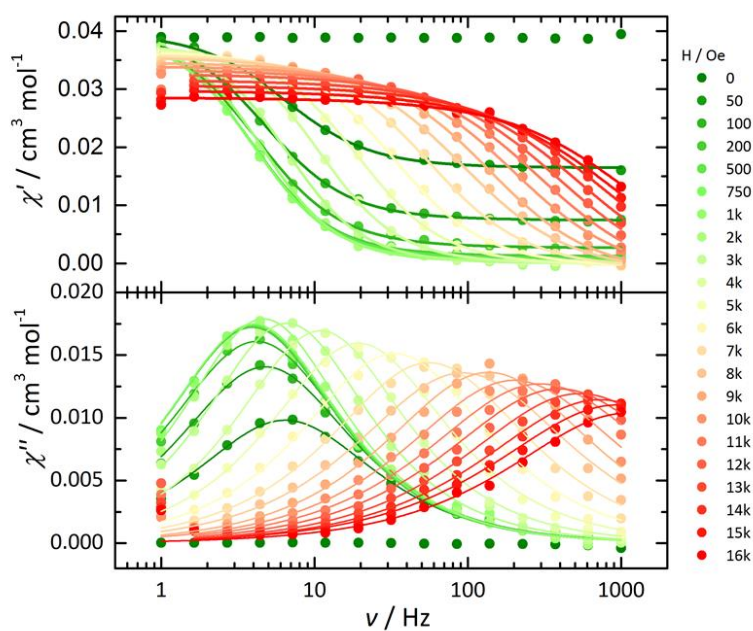

**Fig. S18** Frequency ( $\nu$ ) dependences of the (a) in-phase ( $\chi_M'$ ) and (b) out-of-phase ( $\chi_M''$ ) ac magnetic susceptibilities of **2** at 4 K in several dc magnetic fields. The solid lines were fitted by using eqns. S1–S3.

### Generalized Debye model (eqns. S1–S3)<sup>7</sup>

The real ( $\chi_M'$ ) and imaginary parts ( $\chi_M''$ ) of the ac magnetic susceptibilities are determined by using eqns. S2 and S3, respectively.

$$\chi_{total}(\omega) = \chi_S + \frac{\chi_T - \chi_S}{1 + (i\omega\tau)^{1-\alpha}} \quad (\text{eqn. S1})$$

$$\chi'(\omega) = \chi_S + (\chi_T - \chi_S) \frac{1 + (\omega\tau)^{1-\alpha} \sin(\pi\alpha/2)}{1 + 2(\omega\tau)^{1-\alpha} \sin(\pi\alpha/2) + (\omega\tau)^{2-2\alpha}} \quad (\text{eqn. S2})$$

$$\chi''(\omega) = (\chi_T - \chi_S) \frac{(\omega\tau)^{1-\alpha} \cos(\pi\alpha/2)}{1 + 2(\omega\tau)^{1-\alpha} \sin(\pi\alpha/2) + (\omega\tau)^{2-2\alpha}} \quad (\text{eqn. S3})$$

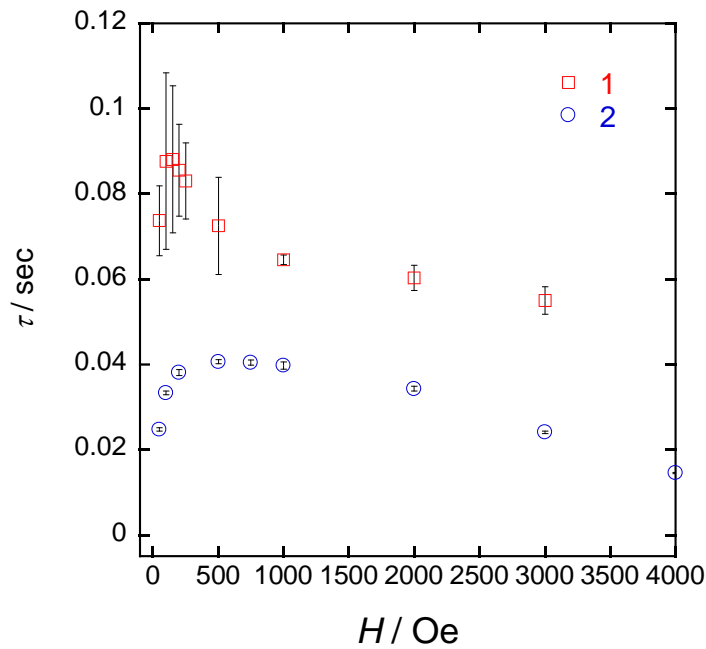

**Fig. S19**  $H_{dc}$  dependence (zero–4000 Oe) of  $\tau$  for **1** and **2** at 4 K.

**Table S7.** Optimised parameters of **2** in Fig. 6a

| complex  | a <sub>1</sub> | a <sub>2</sub> | b         | c     |
|----------|----------------|----------------|-----------|-------|
| <b>2</b> | 55.187         | 0.0010259      | 4.523e-14 | 24.99 |

§ Optimized parameters for **1** are not listed because there is no data up to high magnetic fields and large error bars.

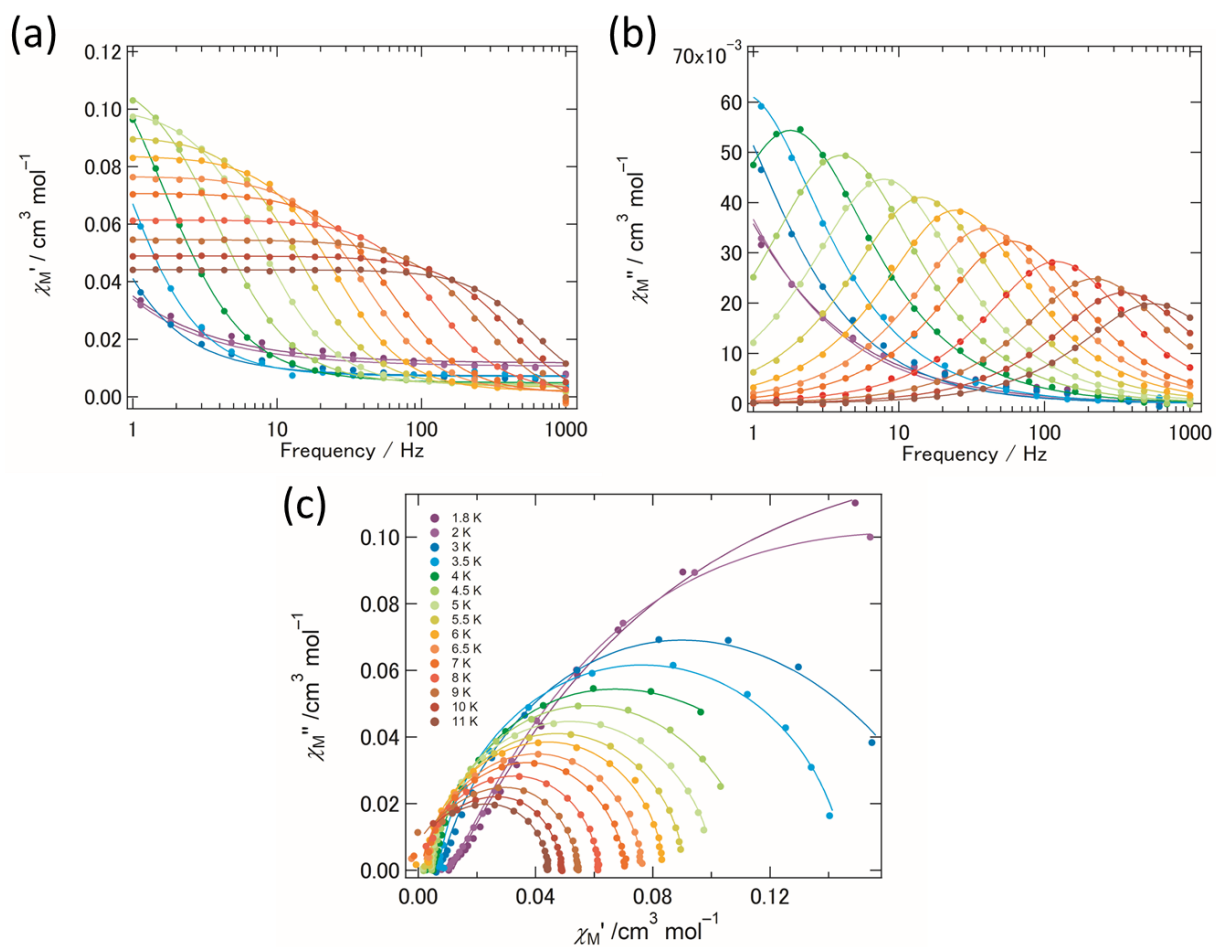

**Fig. S20** Frequency ( $\nu$ ) and temperature ( $T$ ) dependences of the (a) in-phase ( $\chi_M'$ ) and (b) out-of-phase ( $\chi_M''$ ) ac magnetic susceptibilities of **1** in an  $H_{\text{dc}}$  of 250 Oe. The solid lines were fitted by using eqns. S1–S3. The semicircular Argand plots with the small  $\alpha$  parameters (0.02–0.28) confirm that slow magnetic relaxation occurs via a single process.

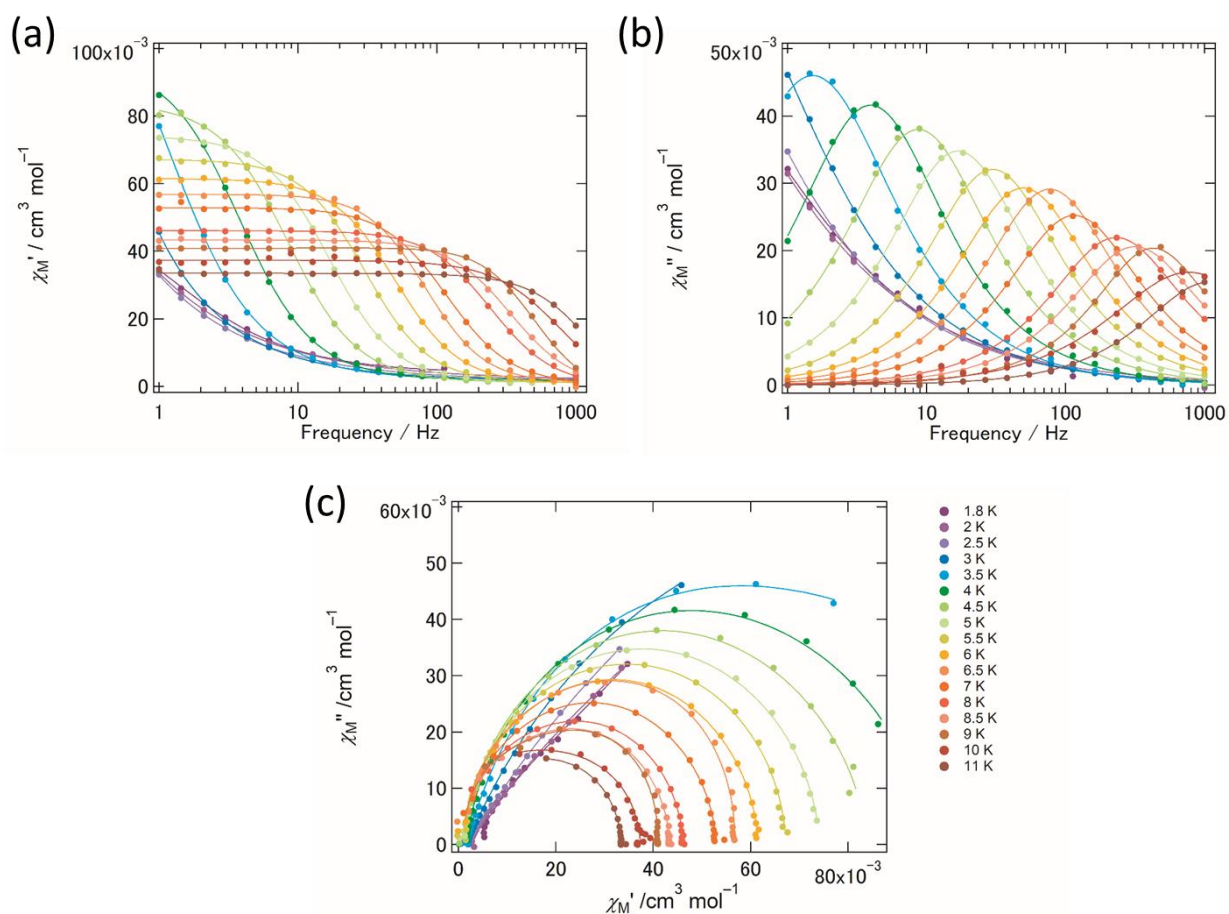

**Fig. S21** Frequency ( $\nu$ ) and temperature ( $T$ ) dependences of the (a) in-phase ( $\chi_M'$ ) and (b) out-of-phase ( $\chi_M''$ ) ac magnetic susceptibilities of **2** in an  $H_{dc}$  of 750 Oe. The solid lines were fitted by using eqns. S1–S3. The semicircular Argand plots with the small  $\alpha$  parameters (0.002–0.28) confirm that slow magnetic relaxation occurs via a single process ( $> 3$  K).

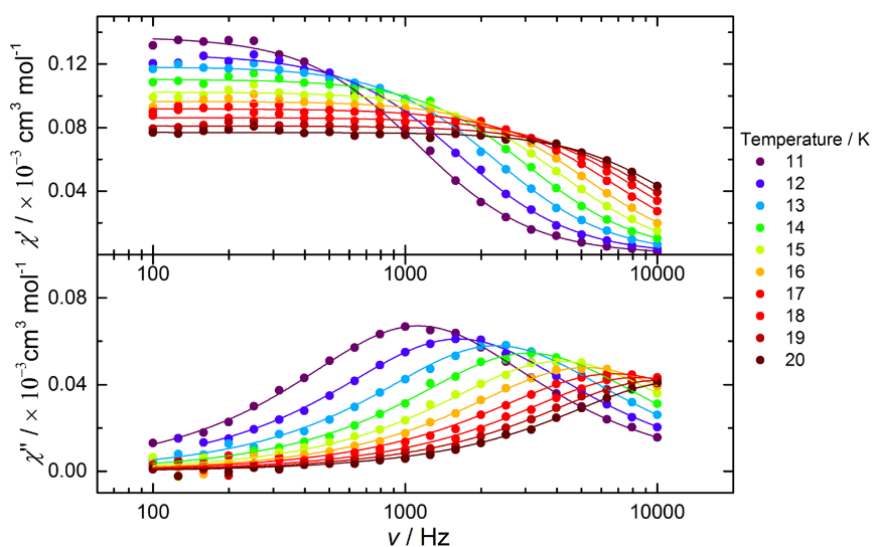

**Fig. S22** Frequency ( $\nu$ ) and temperature ( $T = 11\text{--}20$  K) dependences of the (a) in-phase ( $\chi_M'$ ) and (b) out-of-phase ( $\chi_M''$ ) ac magnetic susceptibilities of **2** in an  $H_{dc}$  of 750 Oe. The solid lines were fitted by using eqns. S1–S3.

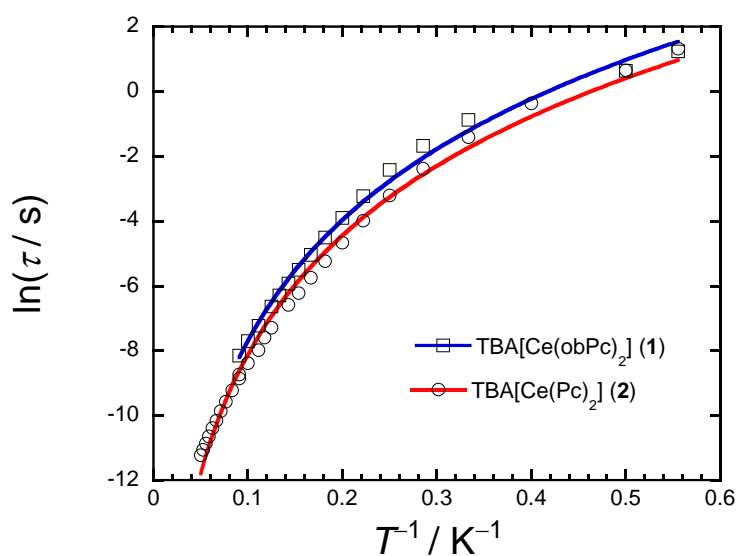

**Fig. S23** An Arrhenius plot of **1** (open square) and **2** (open circles), for which the  $\tau$  values were obtained from  $\chi_M''$  versus  $\nu$  plots. The solid lines were fitted by using  $\tau^{-1} = CT^m$ , respectively. See main text.

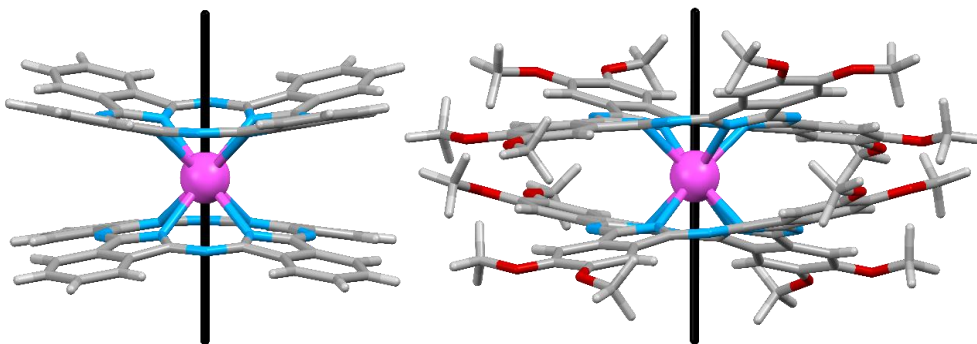

**Fig. S24** Magnetic axis of the ground doublet of  $[\text{Ce}(\text{Pc})_2]^-$  (left) and  $[\text{Ce}(\text{obPc})_2]^-$  (right).

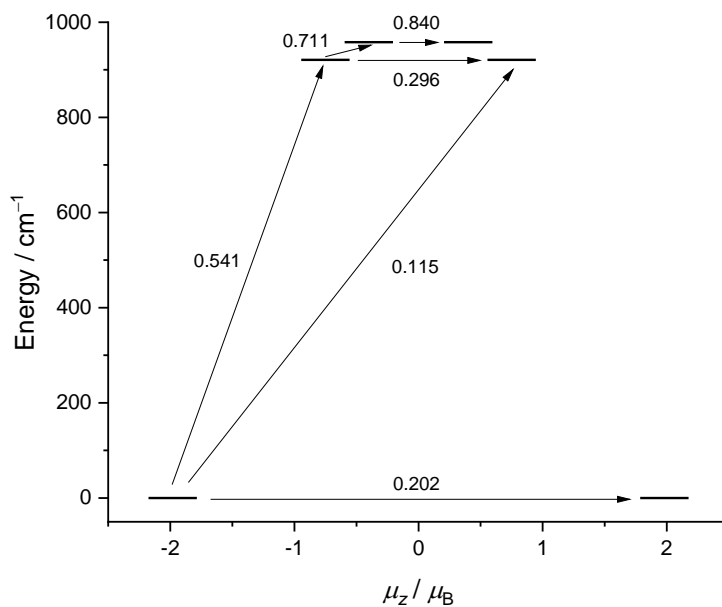

**Fig. S25-1** Ligand field splitting of  $[\text{Ce}(\text{Pc})_2]^-$ . The arrows indicate the relaxation pathway with the transition magnetic moment in units of  $\mu_B$ .

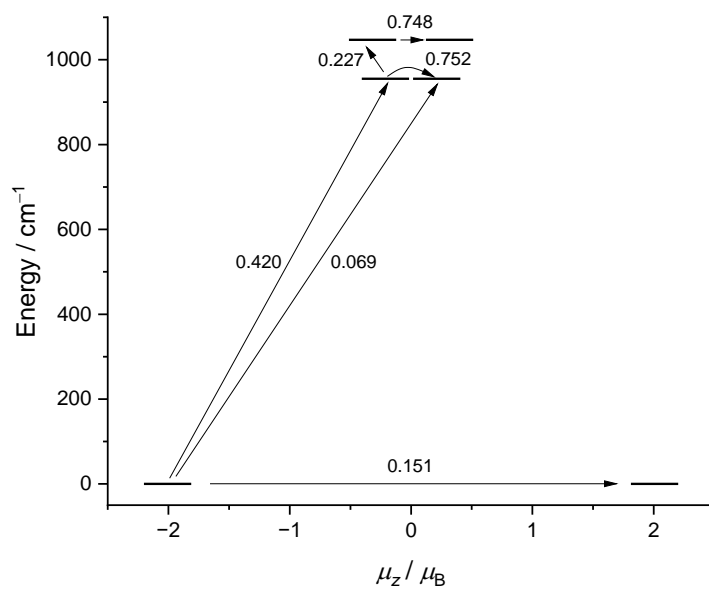

**Fig. S25-2** Ligand field splitting of  $[\text{Ce}(\text{obPc})_2]^-$ . The arrows indicate the relaxation pathway with the transition magnetic moment in units of  $\mu_B$ .

**Table S7.** Energy levels of  ${}^2F_{5/2}$  states

|        | Energy / cm <sup>-1</sup>    | Energy / cm <sup>-1</sup>      |
|--------|------------------------------|--------------------------------|
|        | $[\text{Ce}(\text{Pc})_2]^-$ | $[\text{Ce}(\text{obPc})_2]^-$ |
| w.f. 1 | 0                            | 0                              |
| w.f. 2 | 0                            | 0                              |
| w.f. 3 | 921                          | 955                            |
| w.f. 4 | 921                          | 955                            |
| w.f. 5 | 958                          | 1047                           |
| w.f. 6 | 958                          | 1047                           |



## References

- 1 M. S. Haghghi, C. R. L. Teske and H. Homborg, *Zeitschrift für Anorg. und Allg. Chemie*, 1992, **608**, 73–80.
- 2 H. Hückstädt, A. Tutaß, M. Göldner, U. Cornelissen and H. Homborg, *Z. Anorg. Allg. Chem.*, 2001, **627**, 485–497.
- 3 T. H. Tran-Thi, T. A. Mattioli, D. Chabach, A. D. Cian and R. Weiss, *J. Phys. Chem.*, 1994, **98**, 8279–8288.
- 4 F. Lu, M. Bao, C. Ma, X. Zhang, D. P. Arnold and J. Jiang, *Spectrochim. Acta - Part A Mol. Biomol. Spectrosc.*, 2003, **59**, 3273–3286.
- 5 J. El Fallah, S. Boujana, H. Dexpert, A. Kiennemann, J. Majerus, O. Touret, F. Villain and F. Le Normand, *J. Phys. Chem.*, 1994, **98**, 5522–5533.
- 6 A. Bianconi, A. Marcelli, H. Dexpert, R. Karnatak, A. Kotani, T. Jo and J. Petiau, *Phys. Rev. B*, 1987, **35**, 806–812.
- 7 K. S. Cole and R. H. Cole, *J. Chem. Phys.*, 1941, **I**, 341–351.
